1 Title: A florigen paralog is required for short-day vernalization in a pooid grass.

2

3 **Authors:** Daniel P. Woods<sup>1,2,3,4\*</sup> (ORCID 0000-0002-1498-5707), Yinxin Dong<sup>3,5,6</sup> (ORCID  
4 0000-0002-0187-4135), Frédéric Bouché<sup>3,7</sup> (ORCID 0000-0002-8017-0071), Ryland  
5 Bednarek<sup>3,8</sup>, Mark Rowe<sup>3</sup>, Thomas S. Ream<sup>2,3,9</sup>, and Richard M. Amasino<sup>1,2,3,\*</sup> (ORCID 0000-  
6 0003-3068-5402)

7

8 **Affiliations:**

9

10 <sup>1</sup> Laboratory of Genetics, University of Wisconsin, 425-G Henry Mall, Madison, WI 53706.

11

12 <sup>2</sup> United States Department of Energy Great Lakes Bioenergy Research Center, University of  
13 Wisconsin-Madison.

14

15 <sup>3</sup> Department of Biochemistry, University of Wisconsin, 433 Babcock Dr. Madison, WI 53706.

16

17 <sup>4</sup> Current Address: Plant Sciences Department, University of California-Davis, One Shields Ave.,  
18 104 Robbins Hall, Davis, CA 95616.

19

20 <sup>5</sup> College of Horticulture, Northwest A&F University, Yangling, Shaanxi 712100, China.

21

22 <sup>6</sup> Current Address: Key Laboratory for Plant Diversity and Biogeography of East Asia, Kunming  
Institute of Botany, Chinese Academy of Sciences, Kunming 650201, China.

23

24 <sup>7</sup> Current Address: Laboratory of Plant Physiology, University of Liege, Quartier Vallee 1 Sart  
Tilman Campus, Chemin de la Vallee n. 4, B-4000 Liege, Belgium.

25

26 <sup>8</sup> Current Address: Boyce Thompson Institute, Cornell University, 533 Tower Rd., Ithaca, NY  
14853.

27

<sup>9</sup> Current Address: Monsanto Company, 700 Chesterfield Parkway West, Chesterfield, MO

28

\*Correspondence to: [danielwoods715@gmail.com](mailto:danielwoods715@gmail.com) and [amasino@biochem.wisc.edu](mailto:amasino@biochem.wisc.edu)

29

30

31 **Abstract:** Perception of seasonal cues is critical for reproductive success in many plants.

32

Exposure to winter cold is a cue that can confer competence to flower in the spring via a process

33

known as vernalization. In certain grasses, exposure to short days is another winter cue that can

34

lead to a vernalized state. In *Brachypodium distachyon*, we find that natural variation for the

35

ability of short days to confer competence to flower is due to allelic variation of the florigen

36

paralog *FT-like9* (*FTL9*). An active *FTL9* allele is required for the acquisition of floral

37 competence, demonstrating a novel role for a member of the florigen family of genes. Loss of the  
38 short-day vernalization response appears to have arisen once in *B. distachyon* and spread through  
39 diverse lineages indicating that this loss has adaptive value, perhaps by delaying spring flowering  
40 until the danger of cold damage to flowers has subsided.

41

## 42 **Introduction**

43 Many plants adapted to temperate climates have a biennial or winter-annual life history  
44 strategy. These plants become established in the fall, overwinter, and flower in the spring.  
45 Essential to this adaptive strategy is that flowering does not occur prior to winter and that the  
46 perception of winter leads to competence to flower in the spring (Woods et al., 2014). The winter  
47 cue perceived in many plants is exposure to a prolonged period of cold, and the process by which  
48 such exposure leads to competence to flower is known as vernalization (Chouard, 1960; Woods  
49 et al., 2014). In some plants, however, short days (SD) provide an alternative winter cue (Purvis  
50 and Gregory, 1937; Heide, 1994), and the process by which SD exposure leads to competence to  
51 flower has been referred to as SD vernalization (Purvis and Gregory, 1937). This phenomenon  
52 was called SD vernalization because a hallmark of cold-mediated vernalization is acquisition of  
53 *competence* to flower rather than flowering *per se*, and the SD-vernalization phenomenon is  
54 similar in that exposure to SD leads to competence, but plants must still be exposed to inductive  
55 LD to flower.

56 The physiology of SD vernalization has been studied extensively in rye, wheat, barley,  
57 and oat (Purvis and Gregory 1937; Dubcovsky et al., 2006; Sampson and Burrows 1972; Heide et  
58 al., 1994) although it exists in other families of plants as well (e.g., Chouard 1960). The study of  
59 SD vernalization in wheat and barley is complicated by the fact that there are genotypes of wheat

60 (e.g. Templar) and barley (e.g. Morex) in which flowering *per se* occurs in SD; i.e., certain  
61 wheat and barley genotypes are facultative LD plants in that they flower most rapidly in LD but  
62 also will flower in SD (Kikuchi et al., 2009; Caseo et al., 2011a; Evans et al., 1987). This SD  
63 flowering in wheat and barley is distinct from SD vernalization. *Brachypodium distachyon* (*B.*  
64 *distachyon*), however, is an obligate LD plant that only has a SD-vernalization pathway and not a  
65 SD-flowering pathway (Ream et al., 2014; Gordon et al., 2017; Woods et al., 2014); thus, the  
66 SD-vernalization pathway can be studied in *B. distachyon* without the complication of SD  
67 flowering.

68 Little is known at a molecular level about how the SD-vernalization pathway operates in  
69 any plant species, and thus we have explored the genetic basis of SD vernalization in *B.*  
70 *distachyon*. Our work reveals a novel role for a florigen family gene in the SD-vernalization  
71 pathway and provides a molecular explanation of the distinction between SD vernalization and  
72 SD flowering in the pooid grasses.

73

## 74 **Results and Discussion**

### 75 *Natural Variation in the SD vernalization response in B. distachyon*

76 The model pooid grass *B. distachyon* has a robust cold-mediated vernalization response  
77 (Ream et al., 2014; Gordon et al., 2017). To determine if any accessions also have a SD  
78 vernalization response, we grew 51 accessions in 8-hour SD followed by long days (LD; 16-h or  
79 20-h) and, as controls, solely in LD or SD. Forty of the accessions exhibited a robust SD-  
80 vernalization response: these accessions flowered rapidly after the shift from SD to LD, but in  
81 LD alone flowering occurred only after quite long periods of growth, and the accessions never  
82 flowered in SD alone further confirming that *B. distachyon* is an obligate LD plant (Figure 1A

83 and B, Table S1 and S2, Figure 1-figure supplement 1; Materials and Methods contains the  
84 rationale for the controls). We refer to these 40 lines as SD-vernalization responsive and the 11  
85 lines that did not have a SD vernalization response as SD-vernalization non-responsive.

86         Given that the longest days experienced in the native growth habitats of the *B. distachyon*  
87 accessions tested range between 15-16h (Figure 1-figure supplement 2), we evaluated whether  
88 the SD vernalization response was still effective when SD-grown accessions Koz3, TR12c and  
89 RON2 were shifted into a range of more native photoperiods (Figure 1D). Plants were grown in  
90 8h SD for 9 weeks before shifting into 10, 12, 14, 15, or 16-h photoperiods (Figure 1D). All  
91 three SD-responsive accessions flowered more rapidly after exposure to SD when the length of  
92 day was 12-h or longer (Figure 1D). In *B. distachyon* 12-h is the minimal photoperiod that is still  
93 partially inductive for flowering (Ream et al., 2014; Woods et al., 2017). Thus, the flowering  
94 effect of SD vernalization is manifest at the same inductive photoperiods as cold-mediated  
95 vernalization.

96         To determine if SD vernalization, like cold-mediated vernalization, is a quantitative  
97 response, we conducted a SD-exposure time course. Four SD-responsive and 5 non-responsive  
98 accessions were grown for 2, 4, 6, 8, 10, or 12 weeks in 8-h SD before shifting into LD. Like  
99 cold-mediated vernalization, the SD response is quantitative—longer periods of SD exposure  
100 result in more rapid flowering in the SD-responsive accessions (Figure 1E; figure supplement 1).  
101 Furthermore, 8 weeks of SD exposure saturates the SD-vernalization response. Lastly, even 12  
102 weeks of SD exposure did not enable flowering in any of the accessions we had characterized as  
103 SD non-responsive in the 8-week SD exposure evaluation noted above.

104         We also explored whether the SD vernalization response is possible at a range of  
105 developmental stages. In the experiments described above, the SD treatment started when

106 imbibed seeds were sown in soil and continued until plants were shifted into LD and, thus,  
107 depending upon the length of time in SD, the SD treatment spanned a range of early  
108 developmental stages. To determine if SD vernalization is effective at later developmental  
109 stages, we grew SD-responsive accessions in LD for 2, 4, and 6 weeks and subsequently exposed  
110 them to 8 weeks of SD. Plants were then returned to inductive LD to determine their SD  
111 vernalization responsiveness. All of the SD vernalized plants flowered within 35 days after  
112 shifting back into LD, forming 4 leaves on the parent culm in LD before flowering (Figure 1F;  
113 Figure 1- figure supplement 1D, E), indicating the SD vernalization is equally effective at early  
114 and later developmental stages.

115

#### 116 *Genetic mapping of the SD vernalization response identifies an FT paralog*

117 To explore the genetic basis of natural variation in the SD-vernalization response, we  
118 generated mapping populations from crosses between responsive and non-responsive accessions  
119 (Koz3 X Bd1-1; 12c X Bd1-1; RON2 X Bd1-1; and Koz3 X 29-1; Figure 2-figure supplement  
120 1). In all populations, SD responsiveness segregated as a single, dominant locus (Figure 2-figure  
121 supplement 1A) that mapped as a large-effect QTL near the bottom of chromosome 2 (Figure 2-  
122 figure supplement 1B). Fine mapping narrowed the interval to a region on chromosome 2  
123 containing eight annotated genes (Figure 2-figure supplement 1C). None of these genes are  
124 differentially expressed in the shoot apical meristem or leaf tissue of responsive versus non-  
125 responsive lines grown in SD followed by LD, SD only, or LD only (data not shown), indicating  
126 that the variant underlying this trait is not likely to be in a cis-regulatory region of a gene.  
127 However, there is one nucleotide change in this interval present in all 11 SD non-responsive  
128 accessions that is not found in any of the 40 SD-responsive accessions; this change results in a

129 threonine to lysine substitution at position 94 (T94K) in an *FT* paralog (Table S1-2; Figure 2-  
130 figure supplement 2) referred to as *FT-like 9* (Bradi2g49795; *FTL9*) (Higgins et al., 2010; Figure  
131 2-figure supplement 4). The founding member of this family is *FT* which encodes a small  
132 protein, also known as ‘florigen’, that travels from leaves to the shoot apical meristem to induce  
133 flowering (*e.g.*, (Corbesier et al., 2007; Tamaki et al.)).

134 Molecular analyses confirm that allelic variation at *FTL9* is responsible for natural  
135 variation in the ability of SD exposure to confer competence to flower (Figure 2; Figure 2-figure  
136 supplement 1). First, reducing *FTL9* expression in the SD-responsive accessions Koz3 and Bd21-  
137 3 using artificial microRNAs (amiRNAs) eliminated the SD-vernalization response (Figure 2A  
138 and Figure 2-figure supplement 1 D-I). However, the amiRNA lines remain fully responsive to  
139 cold-mediated vernalization demonstrating that the role of *FTL9* is specific to the SD-  
140 vernalization pathway (Figure 2B and Figure 2-figure supplement 1E-F). Second, constitutive  
141 expression of an *FTL9* cDNA from the SD-responsive accessions Koz3 and Bd21 under the  
142 control of the maize ubiquitin promoter in both SD-responsive (Bd21-3 and Koz3) and non-  
143 responsive accessions (Bd29-1) caused transgenic plants to behave as if they were vernalized  
144 without prior cold or SD treatment both in terms of accelerated flowering as well as expression  
145 of *VERNALIZATION1* (*VRNI*) which is a marker of the vernalized state in grasses (Woods et al.,  
146 2014) (Figure 2C and Figure 2-figure supplement 3). Furthermore, overexpression of *FTL9* does  
147 not result in rapid flowering when plants are grown in SD whereas overexpression of *FTI* does  
148 result in rapid flowering (Figure 2-figure supplement 3). The lack of rapid flowering in the *FTL9*  
149 overexpression transgenics is consistent with the gene providing competence to flower rather  
150 than flowering *per se*, whereas *FTI* expression directly induces flowering. In contrast,  
151 constitutive expression of the *FTL9* cDNA from the SD-non-responsive accession Bd1-1 did not

152 affect the flowering behavior of transgenic lines (Figure 2C; Figure 2-figure supplement 3)  
153 indicating that the T94K change is likely to disrupt *FTL9* function consistent with the recessive  
154 nature of this allele (Figure 2-figure supplement 1A) and that the T94K change occurs in a highly  
155 conserved amino acid in this family of proteins in plants and animals (Figure 2-figure  
156 supplement 2B). In the experiments described above we evaluated transgenic expression of *FTL9*  
157 alleles from both Koz3 and Bd21-3 because *FTL9* alleles from SD-responsive accessions exhibit  
158 variation in the predicted C terminus of the *FTL9* protein: the ancestral state of *FTL9* is 178  
159 amino acids, but in Koz3 there is a deletion of a single nucleotide (G) in amino acid 175 that  
160 alters the reading frame such that *FTL9* is 184aa long. As noted above, both versions of *FTL9*  
161 confer competence to flower.

162

### 163 *Characterization of FTL9 expression*

164 Consistent with its role in SD vernalization, *FTL9* mRNA is barely detectable in LD,  
165 whereas its expression is 350-fold greater in SD (Figure 3A). When SD-grown plants are shifted  
166 to LD, *FTL9* mRNA expression declines to very low levels within a few days (Figure 3A). We  
167 tested whether the quantitative aspect of SD vernalization was correlated with changes in the  
168 expression of *FTL9*, but *FTL9* mRNA levels remained the same over 10 weeks of SD exposure  
169 (Figure 3-figure supplement 1D). Finally, *FTL9* exhibits a diurnal expression pattern in SD with  
170 mRNA levels increasing during the night to a peak at dawn and declining during the day to a  
171 minimum at dusk, *FTL9* expression remains low throughout a 20-h LD (Figure 3B and Figure 3-  
172 figure supplement 1A). However, when plants are shifted to free-run, constant-dark conditions,  
173 *FTL9* mRNA levels plummeted and did not oscillate, indicating that proper *FTL9* expression  
174 requires short day/long night cycles (Figure 3-figure supplement 1B).

175

176 *FTL9* is repressed in LD by *VRN2*

177           Given the day-length dependence of *FTL9* expression, we analyzed its expression in a  
178 *phyC-1* mutant background (Woods et al., 2014). In *phyC* the LD photoperiod flowering pathway  
179 is abolished and mutant plants are extremely delayed in flowering and have the appearance of  
180 SD-grown plants when grown under LD (Woods et al., 2014). Indeed, *FTL9* expression is  
181 significantly elevated in *phyC* mutants grown in LD compared to wild type across all time points  
182 tested (Figure 4E). Thus, certain PHYC-regulated genes may be negative upstream regulators of  
183 *FTL9*. One candidate gene is *FT1*; in barley cultivars that can flower in SD, *HvFT1* has been  
184 postulated to be a repressor of a closely related SD-expressed paralog of *FTL9* called *HvFT3*  
185 (Figure 2-figure supplement 4) because relatively high *HvFT3* expression in SD precedes the  
186 expression of *HvFT1* and, as *HvFT1* expression levels increase in SD, *HvFT3* expression  
187 decreases (Kikuchi et al., 2009). The *FT1* expression pattern in wild-type and the *phyC* mutant is  
188 consistent with a model in which FT1 represses *FTL9*: in the *phyC* mutant in LD, *FT1* is nearly  
189 undetectable (Woods et al., 2014), and *FTL9*, as noted above, is highly expressed, whereas in  
190 wild type *FT1* is expressed in LD and *FTL9* is not. To determine if *FT1* represses *FTL9* in *B.*  
191 *distachyon*, we evaluated *FTL9* expression in *UBI:FT1* transgenic lines grown in SD, a condition  
192 in which *BdFT1* is not expressed in wild-type plants. *FTL9* expression levels were similar  
193 between *UBI:FT1* and wild-type (Figure 2-figure supplement 3H); thus, it is unlikely that *FT1*  
194 acts as a LD repressor of *FTL9* in *B. distachyon*.

195           *VERNALIZATION2* (*VRN2*) is another candidate gene that might repress *FTL9* during LD  
196 because *VRN2* expression is abolished in the *phyC* mutant (Woods et al., 2014) and the level of  
197 *FTL9* expression is inversely correlated with the level of expression of *VRN2* (Figure 4A and  
198 Figure 4-figure supplement 1A). *VRN2* is a flowering repressor, and its expression is a function



199 of day-length (Figure 4A and Figure 4-figure supplement 1A) (Dubcovsky et al., 2006; Woods et  
200 al., 2016). In LD, *VRN2* mRNA levels are elevated and *FTL9* mRNA is barely detectable,  
201 whereas in SD *VRN2* mRNA levels are low and *FTL9* is highly expressed (Figure 4-figure  
202 supplement 1A). When plants are shifted from SD to LD, *VRN2* levels rise to LD levels (Figure  
203 4A), and *FTL9* expression subsides (Figure 3A). This expression pattern contrasts with that of  
204 *VRN2* in a SD-vernalization responsive variety of wheat in which *VRN2* levels remain at low SD  
205 levels after a shift to LD (Dubcovsky et al., 2006). In wheat, *VRN2* is down-regulated by both  
206 cold and short days suggesting that this gene might play a role in the integration of the SD  
207 vernalization and vernalization pathways (Dubcovsky et al., 2006). This is unlikely to be the case  
208 in *B. distachyon* as *VRN2* is up-regulated during the cold (Ream et al., 2014) and *VRN2* down-  
209 regulation in SD is not maintained during a SD-LD shift (Figure 4A).

210 That *VRN2* controls *FTL9* expression in *B. distachyon* is supported by the upregulation  
211 of *FTL9* in LD when *VRN2* expression is suppressed by amiRNAs (Figure 4B and Figure 4-  
212 figure supplement 1B) and the lack of *FTL9* expression and lack of acquisition of competence to  
213 flower in SD when *VRN2* is constitutively expressed (Figure 4C-D and Figure 4-figure  
214 supplement 1C). Thus, *VRN2* is a repressor of flowering that creates a requirement for  
215 vernalization by suppressing flowering when the days are sufficiently long, and, when the day-  
216 length decreases below a threshold in winter, the lack of *VRN2* expression permits *FTL9*  
217 expression which leads to competence to flower. The regulation is one way: over- or under-  
218 expression of *FTL9* does not affect *VRN2* mRNA levels (Figure 2-figure supplement 3D).

219 The repression of *FT* family genes by LD-upregulated *VRN2* appears to be conserved in  
220 grasses. For example, in rice, in which SD are inductive for flowering, expression of the *VRN2*  
221 ortholog *Ghd7* (Woods et al., 2016) is reduced in SD enabling expression of Hd3 which encodes

222 a florigen (Xue et al., 2008). Also, in wheat and barley, the florigen *FT3* is expressed in SD. This  
223 SD-specific expression of *FT3* results from the lower level of *VRN2* expression in SD (Kikuchi  
224 et al., 2009; Casao et al., 2011b).

225

226 *Loss of the SD-vernalization response arose once in B. distachyon*

227         Although all SD non-responsive accessions contain the T94K change at the *FTL9* locus,  
228 they do not cluster in a single group but rather are quite distantly related based on whole-genome  
229 analyses ((Gordon et al., 2017); Figure 2-figure supplement 5A) raising the possibility that the  
230 T94K allele arose independently more than once. However, a phylogenetic analysis focusing on  
231 the 65kb interval containing *FTL9* indicates that in all of the SD-non-responsive accessions the  
232 65kb *FTL9* interval is highly conserved (Figure 2-figure supplement 5B) despite other regions of  
233 the genome being divergent. This suggests that the *FTL9* variant associated with loss of SD  
234 responsiveness arose only once and then spread by outcrossing to diverse accessions where it  
235 was maintained by positive selection. Although, *B. distachyon* is typically inbreeding,  
236 outcrossing occurs as well (Sancho et al., 2018).

237         The adaptive value of an active *FTL9* and a SD-vernalization response, which is the  
238 ancestral state, may be to ensure that vernalization occurs in mild climates in which SD may be a  
239 more reliable indicator of winter than cold. The adaptive value of loss of *FTL9* activity and the  
240 corresponding loss of the SD-vernalization response might be to enable *B. distachyon* to grow in  
241 regions with a more variable spring climate in which a robust SD-vernalization response might  
242 lead to flowering before the danger of a hard freeze, which would damage sensitive floral organs,  
243 had passed. Interestingly, the SD-non-responsive accessions also require a longer period of cold  
244 exposure than the SD-responsive accessions to become fully vernalized ((Gordon et al., 2017)

245 and Figure 1C; Table S3) which is consistent with the SD-non-responsive accessions having  
246 undergone adaptation for later spring flowering. Also, consistent with this hypothesis on the  
247 adaptive value of loss of *FTL9* activity, the non-responsive accessions tend to have been  
248 collected at higher latitudes than the responsive accessions (Figure 1-figure supplement 2);  
249 however, latitude is only one of many factors that may relate to the latest date of a damaging  
250 freeze.

251

### 252 *Roles of SD expressed FT-like genes in grass flowering*

253 *FTL9* is part of a *FT*-like gene family that has expanded to 14 members in grasses  
254 ((Higgins et al., 2010) and Figure 2-figure supplement 4). The roles of the other *FT*-like genes in  
255 grasses have not been thoroughly explored. Studies in wheat and barley indicate that a candidate  
256 gene underlying a QTL that confers the ability of certain varieties to flower in SD (*Ppd-H2*)  
257 (Laurie et al., 1995) is likely a paralog of *FT* referred to as *FT3* (Faure et al., 2007; Kikuchi et  
258 al., 2009; Casao et al., 2011a). The dominant *FT3* allele, which enables SD flowering, is often  
259 found in spring barley cultivars grown in more southern latitudes, whereas the recessive allele is  
260 typically associated with winter cultivars grown in more northern latitudes (Casao et al., 2011a).  
261 *FT3* is implicated in actual flowering in SD in wheat and barley as opposed to the competence to  
262 flower in LD that is conferred by SD-specific expression of *FTL9* in *B. distachyon*. *FTL10* is the  
263 *B. distachyon* ortholog of wheat and barley *FT3* (Halliwell et al., 2016; Figure 2-figure  
264 supplement 4). *FTL10* and *FTL9* are closely related paralogs that resulted from a grass-specific  
265 duplication event, and thus *FTL10* and *FTL9* reside in sister clades (Figure 2-figure supplement  
266 4). *FT3* is up-regulated in SD in barley and wheat, whereas *FTL10* expression in *B. distachyon* is  
267 not modulated by day-length and its expression level is quite low in all conditions tested (Figure

268 3D). However, constitutive expression of *FTL10* from the maize ubiquitin promoter results in  
269 flowering during transgenic line generation in tissue culture (Figure 3E) and rapid flowering in  
270 SD (Figure 2-figure supplement 3I, J) similar to the effects of expression of other *FTI* orthologs  
271 in *B. distachyon* (Figure 2-figure supplement 3I, J ; Ream et al., 2014) and wheat (Lv et al.,  
272 2014) indicating that *FTL10* has florigen activity. In contrast, as discussed above, constitutive  
273 expression of *FTL9* does not induce flowering in SD or in tissue culture which is consistent with  
274 its role in establishing competence to flower as opposed to the florigen-like role of *FTL10* in  
275 inducing flowering (Figure 2-figure supplement 3G, I, J).

276 Interestingly, like *FTL9* in *B. distachyon*, the *FTL9* ortholog in sorghum and maize called  
277 *CENTRORADIALIS 12* (*CN12*) (Figure 2-figure supplement 4, Figure 2-figure supplement 6;  
278 Murphy et al., 2011; Meng et al., 2011) is also expressed only in SD. However, in sorghum and  
279 maize, which are SD-flowering or day neutral plants, *CN12* along with *CN8* (the *FTL10/FT3*  
280 ortholog) are both florigenic (Meng et al., 2011; Lazakis et al., 2011). Thus, gene duplication of  
281 an ancestral SD-expressed *FT*-like gene at the base of the grass family appears to have resulted  
282 in the *FTL9/CN12* and *FTL10/FT3/CN8* clades (Figure 2-figure supplement 4). Grasses that are  
283 classified as SD plants like sorghum and photoperiodic maize (Murphy et al., 2011; Meng et al.,  
284 2011) are in fact SD plants because a florigenic member of one of the SD-expressed clades  
285 provides the primary florigen activity. Wheat and barley are LD plants because the strongest  
286 florigen activity is provided by LD-expressed *FT* family members in other clades such as *FT1*.  
287 However, many varieties of wheat and barley exhibit a facultative LD response—i.e., they also  
288 can flower in SD. The SD flowering of barley appears to result from expression of SD-induced  
289 clade members such as *FT3* (Kikuchi et al., 2009; Faure et al., 2007). All accessions of *B.*  
290 *distachyon* that we have analyzed are obligate LD plants because the florigenic member of the

291 clade, *FLL10*, is not expressed at sufficient levels to cause flowering in SD and the other member  
292 of the clade, *FLL9*, evolved the different function of providing competence to flower in pooid  
293 grasses rather than directly promoting flowering like it does in sorghum and maize.

294 SD-mediated vernalization was first described in rye in 1937 (Purvis and Gregory, 1937)  
295 and has been described in wheat and barley (Evans, 1987; Heide, 1994; Dubcovsky et al., 2006);  
296 however, sequence data available to date has not revealed a clear ortholog of *FLL9* in wheat or  
297 barley (Figure 2-figure supplement 4; Faure et al., 2007). It will be interesting to determine  
298 whether *FLL9* orthologs or other *FT* family members are involved in SD vernalization in cereals.

299 Gene duplication and divergence has enabled diverse roles for *FT* family members in  
300 flowering. The founding members of the *FT* family provide florigen activity (Corbesier et al.,  
301 2007; Tamaki et al.). In beet, an *FT* family member is an inhibitor of flowering that is key to  
302 establishing a requirement for vernalization. Our work in *B. distachyon* reveals a new role for an  
303 *FT* family member: the establishment of competence to flower without direct florigen activity.

304

### 305 *Convergence between the SD vernalization and cold-mediated vernalization pathways*

306 To explore the relationship between SD vernalization and the cold-mediated vernalization  
307 pathway, we evaluated the expression of the key flowering genes *VRN1* and *FT1* (known as  
308 *VRN3* in wheat, Yan et al., 2006) in SD, LD and during a SD-LD shift (Figure 5). *FT1* and *VRN1*  
309 are lowly expressed in SD only and LD only in Koz3 and Bd1-1 consistent with the delayed  
310 flowering phenotype of these accessions without prior SD or cold vernalization (Figure 5).  
311 However, prolonged exposure of Koz3 (SD vernalization responsive) to SD followed by a shift  
312 to LD (SD-LD) results in the up-regulation of both *FT1* and *VRN1*, whereas this treatment does  
313 not result in *FT1* and *VRN1* expression in the SD non-responsive accession Bd1-1 (Figure 5).

314 Thus, SD vernalization provides competence to flower by enabling the expression of *VRNI* and  
315 *FTI* once plants are in LD. As previously shown for cold-mediated vernalization (Woods et al.,  
316 2016), SD-mediated vernalization is attenuated in *amiVRNI* transgenic lines (Figure 5C, D),  
317 further corroborating that the cold- and SD-mediated vernalization pathways converge on  
318 enabling expression of genes like *VRNI* when plants are exposed to inductive LD. It is important  
319 to note that the loss of *FTL9* activity has no effect on cold-mediated vernalization (Figure 2)  
320 demonstrating that there are features that define the two pathways as separate. It will be  
321 interesting to determine mechanisms through which *FTL9* expression in SD enables an alternate  
322 path to cold-mediated vernalization to provide competence to flower. This competence is due, at  
323 least in part, by enabling *VRNI* expression to increase in LD. For example, *FTL9* may be  
324 involved in modifying *VRNI* chromatin during SD to allow its activation during LD. A similar  
325 model may apply to the cold-mediated vernalization pathway: for example, repression of *VRNI*  
326 before cold-mediated vernalization is associated with high levels of H3K27me3 at *VRNI*  
327 chromatin in both wheat and *B. distachyon* (Oliver et al., 2009; Woods et al., 2017).

328

### 329 *SD-mediated vernalization in other groups of plants*

330 Similar to cold-mediated vernalization, the SD-mediated vernalization response is found  
331 in an array of species spanning flowering plant diversification (Chouard, 1960; Heide et al.,  
332 1994). Advances in understanding the molecular underpinnings of cold-mediated vernalization in  
333 several different plant groups as well in paleobotany and earth climate history indicate that cold-  
334 mediated vernalization likely evolved independently multiple times as flowering plants were  
335 radiating some 140 million years ago (e.g., Bouche et al., 2017). The fact that *FTL9* appears to  
336 be grass-specific suggests that SD-mediated vernalization likely evolved independently several

337 times. It will be interesting to evaluate the molecular basis of SD-vernalization pathways in  
338 different plant groups.

339

## 340 **Materials and Methods**

### 341 Growth Conditions and Plant Phenotyping

342 Seeds were imbibed overnight in distilled water at 5°C then grown in MetroMix 360 (Sungrow)  
343 in 3-inch plastic pots under four 5000 K T5 fluorescent bulbs ( $300 \text{ mmol m}^{-2} \text{ s}^{-1}$  at plant level)  
344 at 21-22°C during the light period and 18°C during the dark and fertilized weekly with Peters  
345 Excel 15-5-15 Cal-Mag and Peters 10-30-20 Blossom Booster (RJ Peters). To minimize light  
346 intensity differences, plant positions were rotated several times per week. Flowering time was  
347 measured as the number of days from the emergence of the coleoptile to the day when  
348 emergence of the spike was visible. The developmental stage of the plant was recorded as the  
349 number of primary leaves derived from the parent culm at the time of heading. For all  
350 experiments at least 6 plants were used to obtain the days to heading and leaf count averages.  
351 Representative phenotyping results are presented, each of which were repeated in independent  
352 experiments with similar results.

353

### 354 Marker Development

355 Development of indel markers (Table S4) was done using the sequenced genomes of Koz3, Bd1-  
356 1, 12c, Bd29-1, and RON2 (Gordon et al., 2017). All markers are optimized to anneal at 51°C  
357 and produce a product roughly 100bp in length. Markers were resolved using a 3% sodium  
358 borate agarose gel.

359 Generation of *amiFTL9* and *UBIFTL9*, *UBIFTL10* Transgenic lines

360 amiRNAs specific for two distinct parts of the *FTL9* mRNA were designed using the amiRNA  
361 designer tool at [wmd3.weigelworld.org](http://wmd3.weigelworld.org) based on MIR528 from rice in the pNW55 vector.  
362 Gateway-compatible *amiFTL9* PCR products were recombined into pDONR221 using Life  
363 Technologies BP Clonase II following the manufacturer's protocol. Clones were verified by  
364 sequencing. The pDONR221 vector containing the desired amiRNA in combination with another  
365 vector containing the maize ubiquitin promoter were both recombined into destination vector  
366 p24GWI (designed by Devin O'Connor at the Plant Gene Expression Center, Albany, CA) using  
367 Life Technologies LR clonase II plus following the manufacturer's protocol. Clones were  
368 verified by sequencing to ensure that the maize ubiquitin promoter was upstream from the  
369 amiRNA. The constructs were transformed into *A. tumefaciens* strain Agl-1. Plant callus  
370 transformation was as previously described (Vogel et al., 2008). Independent transgenic lines  
371 were genotyped for the transgene using an amiRNA forward primer specific for the targeted  
372 transcript and a reverse primer derived from the pNW55 backbone sequence (Table S5). Primers  
373 used to generate the amiRNAs are listed in Table S5.

374 *FTL9* cDNAs were amplified from SD-grown Bd21, Koz3, and Bd1-1 plants. *FTL10* cDNAs  
375 were amplified from Bd21-3 grown in LD. cDNAs were gel extracted (Qiagen) and cloned using  
376 CloneJET PCR according to the manufacturer's protocol (Thermo Fischer Scientific). Clones  
377 were verified by sequencing. The cDNA was then subcloned using primers compatible with the  
378 Gateway BP clonase system according to the manufacturer's protocol (Thermo Fischer  
379 Scientific). The BP plasmid was verified by sequencing and then recombined into pANIC10A  
380 (Mann et al., 2012) using Life Technologies LR Clonase II following the manufacturer's  
381 protocol. Clones were verified by sequencing in pANIC10A and then transformed into



382 *Agrobacterium tumefaciens* strain Agl-1. Plant callus transformation was performed as described  
383 (Vogel et al., 2008). Independent transgenic lines were genotyped for the transgene using a  
384 cDNA-specific forward and pANIC vector AcV5 tag reverse primer (Table S5). Primer pairs  
385 used to clone each cDNA are listed in Table S5.

#### 386 RNA expression analysis and qPCR

387 RNA extraction and expression analysis were performed as described in (Ream et al., 2014).

388

#### 389 QTL analysis

390 QTL analysis was performed as described in (Woods et al., 2017).

391

#### 392 Phylogenetic and syntenic analyses

393 Phylogenetic analyses of *FT*-like genes were performed using both the full-length *FTL9* and *FT*  
394 genes and the PEBP domains as seed sequences for BLAST searches using Phytozome and  
395 NCBI as described in (Woods et al., 2011). Maximum-likelihood analyses were conducted using  
396 SeaView 4.5.4 (Gouy et al., 2010). Phylogenetic analysis of the SD-vernalization interval across  
397 51 *B. distachyon* accessions was done using variants called within a VCF file generated as in  
398 (Gordon et al., 2017). Relationships among *B. distachyon* accessions based on the mapped  
399 interval were determined using the TASSEL 5 software package (Bradbury et al., 2007). Synteny  
400 in the chromosomal regions around *FTL9* of *Brachypodium distachyon*, *Oryza sativa*, *Setaria*  
401 *italica*, *Sorghum bicolor*, *Panicum hallii*, and *Zea mays* was investigated using the GEvo  
402 software package within CoGe (Lyons et al., 2008).

#### 403 LD only and SD only controls for characterization of the SD-vernalization response.

404 To determine if prolonged growth in short days followed by a shift into long days (SD-LD) can  
405 promote flowering, we grew 43 delayed flowering accessions in 8-hour short days for 8 weeks  
406 before shifting into either 16 or 20-hour days (Table S1-2). The two controls for this experiment  
407 were accessions grown in SD and LD only. The SD only control demonstrates that growth in SD  
408 is indeed non-inductive for flowering because growth for 150 days does not permit flowering in  
409 any of the accessions tested (Table S1-2). Dissections on the parent culm revealed that the  
410 meristems were still vegetative after 150 days of growth in SD in all accessions tested, consistent  
411 with previous reports (Woods et al., 2014; Gordon et al., 2017). The LD only control was chosen  
412 to ensure that if robust flowering occurs following a shift from SD to LD, this was indeed due to  
413 the prior SD treatment and not simply due to the age of the plant when shifted into inductive LD.  
414 Thus, an accession is SD vernalization responsive if the SD-LD shifted plants flower much more  
415 rapidly than the LD only controls.

416

417 Control for day and night temperature during SD vernalization.

418 To ensure the acceleration of flowering by prolonged exposure to SD was indeed due to the  
419 shorter photoperiod and not due to extended periods of cooler dark temperatures of 18°C, we  
420 grew four accessions (KOZ3, 12c, RON2 and Bd18-1) in SD under constant day and night  
421 temperatures of 21°C. Accessions grown under constant 21°C day/night temperatures showed  
422 the same robust SD vernalization response as those grown under 21°C/18°C day/night  
423 temperatures (data not shown), indicating that the SD vernalization phenomenon is due strictly to  
424 the photoperiod and not a composite of photoperiod and temperature.

425 **Acknowledgments:** We thank John Vogel and Sean Gordon for leading the effort to sequence  
426 and analyze 51 *B. distachyon* genomes (Gordon et al., 2017) which provided data critical for this

427 work. We thank Jill Mahoy and Heidi Kaepler for providing transgenic *B. distachyon* lines, and  
428 Scott Woody for many helpful suggestions on improving this manuscript. **Funding:** This work  
429 was funded in part by the National Science Foundation (IOS-1258126 to R.M.A.), the Great  
430 Lakes Bioenergy Research Center (Department of Energy Biological and Environmental  
431 Research Office of Science DE-FCO2-07ER64494), a National Institutes of Health-sponsored  
432 pre-doctoral training fellowship to the University of Wisconsin Genetics Training program to  
433 D.P.W., a Gordon and Betty Moore Foundation and the Life Sciences Research Foundation  
434 fellowship to support T.S.R., and a Wallonie-Bruxelles International fellowship to F.B.

435 **Author Contributions:** D.P.W., and R.M.A. conceived and designed research plans with  
436 assistance from T.S.R and F.B.; D.P.W. and Y.D. characterized the SD vernalization  
437 phenomenon across sequenced *B. distachyon* accessions; F.B. analyzed climate data; M.R. and  
438 D.P.W. developed markers and performed QTL analysis; R.B. and Y.D. cloned *FTL9* and  
439 phenotyped with D.P.W; D.P.W. prepared figures with input from F.B. and R.M.A.; D.P.W. and  
440 R.M.A. wrote the article with contributions and approval of all authors. **Competing Interests:**  
441 Authors declare no competing interests. **Data and materials availability:** All data us available  
442 in the main text or the supplementary materials.

#### 443 **Supplementary Materials:**

444 Figures S1-S10

445 Tables S1-S5

446

447

#### 448 **References**

- 449 **Bouché F, Woods DP, Amasino RM** (2017) Winter Memory throughout the Plant Kingdom:  
450 Different Paths to Flowering. *Plant Physiology* **173**: 27–35
- 451 **Bradbury P, Zhang Z, Kroon DE, Casstevens TM, Ramdoss Y, Buckler ES** (2007)  
452 *TASSEL*: Software for association mapping of complex traits in diverse samples.  
453 *Bioinformatics* **23**:2633-2635.
- 454 **Casao MC, Karsai I, Igartua E, Gracia MP, Veisz O, Casas AM** (2011a) Adaptation of  
455 barley to mild winters: A role for *PPDH2*. *BMC Plant Biol* **11**: 164
- 456 **Casao MC, Igartua E, Karsai I, Lasa JM, Gracia MP, Casas AM** (2011b) Expression  
457 analysis of vernalization and day-length response genes in barley (*Hordeum vulgare* L.)  
458 indicates that *VRNH2* is a repressor of *PPDH2* (*HvFT3*) under long days. *Journal of*  
459 *Experimental Botany* **62**: 1939–1949
- 460 **Chouard P** (1960) Vernalization and its relations to dormancy. *Annu Rev Plant Physiol* **11**: 191–  
461 238
- 462 **Corbesier L, Vincent C, Jang S, Fornara F, Fan Q, Searle I, Giakountis A, Farrona S,**  
463 **Gissot L, Turnbull C, et al** (2007) FT Protein Movement Contributes to Long-Distance  
464 Signaling in Floral Induction of Arabidopsis. *Science* **316**: 1030–1033
- 465 **Dubcovsky J, Loukoianov A, Fu D, Valarik M, Sanchez A, Yan L** (2006) Effect of  
466 Photoperiod on the Regulation of Wheat Vernalization Genes *VRN1* and *VRN2*. *Plant Mol*  
467 *Biol* **60**: 469–480
- 468 **Evans LT** (1987) Short day induction of inflorescence initiation in some winter wheat varieties.  
469 *Functional Plant Biol* **14**: 277–286
- 470 **Faure S, Higgins J, Turner A, Laurie DA** (2007) The *FLOWERING LOCUS T*-Like Gene  
471 Family in Barley (*Hordeum vulgare*). *Genetics* **176**: 599–609
- 472 **Fjellheim S, Boden S, Trevaskis B** (2014) The role of seasonal flowering responses in  
473 adaptation of grasses to temperate climates. *Front. Plant Sci.* **5**:431
- 474 **Gordon SP, Contreras-Moreira B, Woods DP, Marais Des DL, Burgess D, Shu S, Stritt C,**  
475 **Roulin AC, Schackwitz W, Tyler L, et al** (2017) Extensive gene content variation in the  
476 *Brachypodium distachyon* pan-genome correlates with population structure. *Nature*  
477 *Communications* **8**: 2184
- 478 **Gouy M, Guindon S, Gascuel O** (2010) SeaView Version 4: A Multiplatform Graphical User  
479 Interface for Sequence Alignment and Phylogenetic Tree Building. *Mol. Biol. Evol.* **27**, 221–  
480 224
- 481 **Halliwell J, Borrill P, Gordon A, Kowalczyk R, Pagano ML, Saccomanno B, Bentley AR,**  
482 **Uauy C, Cockram J** (2016) Systematic Investigation of *FLOWERING LOCUS T*-Like  
483 Poaceae Gene Families Identifies the Short-Day Expressed Flowering Pathway Gene, *TaFT3*  
484 in Wheat (*Triticum aestivum* L.). *Front Plant Sci* **7**: 1783–15

- 485 **Heide OM** (1994) Control of flowering and reproduction in temperate grasses. *New Phytol* **128**:  
486 347–362
- 487 **Higgins JA, Bailey PC, Laurie DA** (2010) Comparative Genomics of Flowering Time  
488 Pathways Using *Brachypodium distachyon* as a Model for the Temperate Grasses. PLoS  
489 ONE **5**: e10065
- 490 **Kikuchi R, Kawahigashi H, Ando T, Tonooka T, Handa H** (2009) Molecular and Functional  
491 Characterization of PEBP Genes in Barley Reveal the Diversification of Their Roles in  
492 Flowering. *Plant Physiology* **149**: 1341–1353
- 493 **Lazakis CM, Coneva V, Colasanti J** (2011) ZCN8 encodes a potential orthologue of  
494 Arabidopsis FT florigen that integrates both endogenous and photoperiod flowering signals  
495 in maize. *Journal of Experimental Botany* **62**: 4833–4842
- 496 **Laurie DA, Pratchett N, Snape JW, Bezant JH** (1995) RFLP mapping of five major genes and  
497 eight quantitative trait loci controlling flowering time in a winter x spring barley (*Hordeum*  
498 *vulgare* L.) cross. *Genome* **38**: 575–585
- 499 **Lv B, Nitcher R, Han X, Wang S, Ni F, Li K, Pearce S, Wu J, Dubcovsky J, Fu D** (2014)  
500 Characterization of *FLOWERING LOCUS T1 (FT1)* Gene in Brachypodium and Wheat.  
501 PLoS ONE **9**: e94171
- 502 **Lyons E, Freeling M**, (2008) How to usefully compare homologous plant genes and  
503 chromosomes as DNA sequences. *Plant J.* **53**, 661–673
- 504 **Mann DGJ. et al.** (2012) Gateway-compatible vectors for high-throughput gene functional  
505 analysis in switchgrass (*Panicum virgatum* L.) and other monocot species. *Plant Biotechnol.*  
506 *J.* **10**, 226–236
- 507 **Meng X, Muszynski MG, Danilevskaya ON** (2011) The *FT*-like *ZCN8* gene functions as a  
508 floral activator and is involved in photoperiod sensitivity in maize. *Plant Cell* **23**: 942–  
509 960.
- 510 **Murphy RL, Klein RR, Morishige DT, Brady JA, Rooney WL, Miller FR, Dugas DV, Klein**  
511 **PE, Mullet JE** (2011) Coincident light and clock regulation of *pseudoresponse regulator*  
512 *protein 37 (PRR37)* controls photoperiodic flowering in sorghum. *Proc Natl Acad Sci USA*  
513 **108**: 16469–16474
- 514 **Oliver SN, FINNEGAN EJ, DENNIS ES, Peacock WJ, Trevaskis B** (2009) Vernalization-  
515 induced flowering in cereals is associated with changes in histone methylation at the  
516 *VERNALIZATION1* gene. *Proc Natl Acad Sci USA* **106**: 8386–8391
- 517 **Pin PA, Benlloch R, Bonnet D, Wremerth-Weich E, Kraft T, Gielen JJJ, Nilsson O** (2010)  
518 An Antagonistic Pair of *FT* Homologs Mediates the Control of Flowering Time in Sugar  
519 Beet. *Science* **330**: 1397–1400
- 520 **Purvis ON, Gregory FG** (1937) Studies in Vernalisation of Cereals. *Annals of Botany* **1**: 1–26

- 521 **Ream TS, Woods DP, Amasino RM** (2012) The molecular basis of vernalization in different  
522 plant groups. *Cold Spring Harb Symp Quant Biol* **77**: 105–115
- 523 **Ream TS, Woods DP, Schwartz CJ, Sanabria CP, Mahoy JA, Walters EM, Kaeppler HF,**  
524 **Amasino RM** (2014) Interaction of Photoperiod and Vernalization Determines Flowering  
525 Time of *Brachypodium distachyon*. *Plant Physiology* **164**: 694–709
- 526 **Sampson, D. R., and Burrows, V. D.** (1972). Influence of photoperiod, short-day vernalization,  
527 and cold vernalization on days to heading in *Avena* species and cultivars. *Can. J. Plant*  
528 *Sci.* **52**, 471–482.
- 529 **Sancho R, Cantalapiedra C, Lopez-Alvarez D, Gordon S, Vogel J, Catalan P, Contreras-**  
530 **Moreira B** (2018) Comparative plastome genomics and phylogenomics of  
531 *Brachypodium*: flowering time signatures, introgression and recombination in recently  
532 diverged ecotypes. *New Phytologist*. **218**, 1631-1644
- 533 **Sasani S, Hemming MN, Oliver SN, Greenup A, Tavakkol-Afshari R, Mahfoozi S, Poustini**  
534 **K, Sharifi HR, Dennis ES, Peacock WJ, et al** (2009) The influence of vernalization and  
535 daylength on expression of flowering-time genes in the shoot apex and leaves of barley  
536 (*Hordeum vulgare*). *Journal of Experimental Botany* **60**: 2169–2178
- 537 **Tamaki S, Matsuo S, Wong HL** (2007) Hd3a protein is a mobile flowering signal in rice.  
538 *Science*. **316**, 1033-1036
- 539 **Trevaskis B, Hemming MN, Dennis ES, Peacock WJ** (2007) The molecular basis of  
540 vernalization-induced flowering in cereals. *Trends in Plant Science* **12**: 352–357
- 541 **Vogel J, Hill T** (2008) High-efficiency Agrobacterium-mediated transformation of  
542 *Brachypodium distachyon* inbred line Bd21-3. *Plant Cell Reports*. **27**, 471–478
- 543 **Whittaker C, Dean C** (2017) The *FLC* Locus: A Platform for Discoveries in Epigenetics and  
544 Adaptation. *Annu Rev Cell Dev Biol* **33**: 555–575
- 545 **Woods DP, Hope, CL, Malcomber, ST** (2011) Phylogenomic analyses of the *BARREN*  
546 *STALK1/LAX PANICLE1 (BA1/LAX1)* genes and evidence for their roles during axillary  
547 meristem development. *Mol. Biol. Evol.* **28**, 2147–2159
- 548 **Woods DP, Ream TS, Amasino RM** (2014) Memory of the vernalized state in plants including  
549 the model grass *Brachypodium distachyon*. *Front Plant Sci* **5**: 99
- 550 **Woods DP, Ream TS, Minevich G, Hobert O, Amasino RM** (2014) PHYTOCHROME C is  
551 an essential light receptor for photoperiodic flowering in the temperate grass, *Brachypodium*  
552 *distachyon*. *Genetics* **198**: 397–408
- 553 **Woods DP, Bednarek R, Bouché F, Gordon S, Vogel J, Garvin D, Amasino RM** (2017)  
554 Genetic Architecture of Flowering-Time Variation in *Brachypodium distachyon*. *Plant*  
555 *Physiology*. **173**, 269–279

- 556 **Woods DP, Ream TS, Bouché F, Lee J, Thrower N, Wilkerson C, Amasino RM** (2017)  
557 Establishment of a vernalization requirement in *Brachypodium distachyon* requires  
558 *REPRESSOR OF VERNALIZATION1*. *Proc Natl Acad Sci USA*. **25**, 6623-6628
- 559 **Xue W, Xing Y, Weng X, Zhao Y, Tang W, Wang L, Zhou H, Yu S, Xu C, Li X, et al** (2008)  
560 Natural variation in *Ghd7* is an important regulator of heading date and yield potential in  
561 rice. *Nat Genet* **40**: 761–767
- 562 **Yan L, Loukoianov A, Tranquilli G, Helguera M, Fahima T, Dubcovsky J** (2003) Positional  
563 cloning of the wheat vernalization gene *VRN1*. *Proc Natl Acad Sci USA* **100**: 6263–6268
- 564  
565 **Yan L, Fu D, Li C, Blechl A, Tranquilli G, Bonafede M, Sanchez A, Valarik M, Yasuda S,**  
566 **Dubcovsky J** (2006) The wheat and barley vernalization gene *VRN3* is an orthologue of *FT*.  
567 *Proc Natl Acad Sci USA* **103**: 19581–19586
- 568  
569  
570  
571  
572  
573  
574  
575  
576  
577  
578  
579  
580  
581

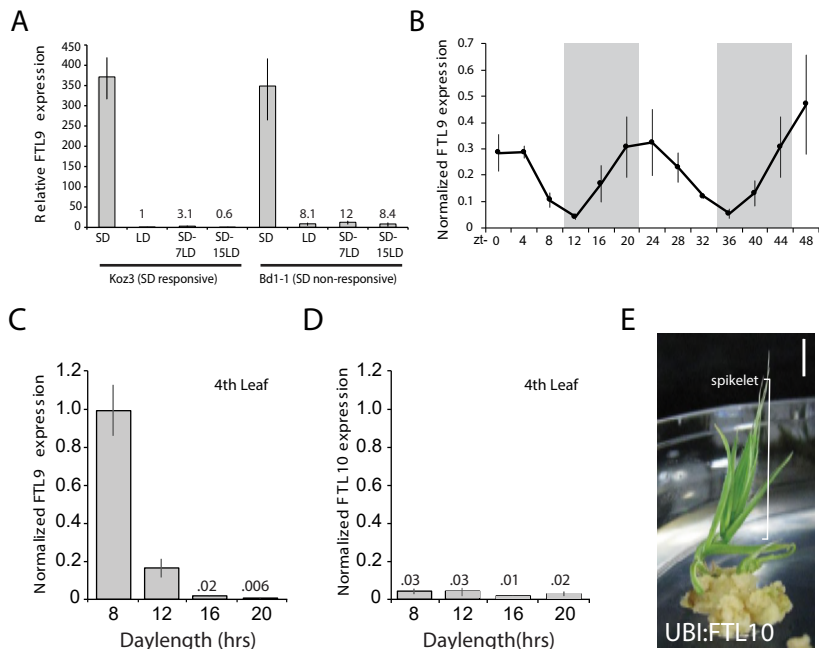

**Fig. 3. *FTL9* expression is SD specific and diurnally fluctuating whereas *FTL10* expression is not influenced by day-length and encodes a florigenic protein.** (A) *FTL9* mRNA levels in *Koz3* and *Bd1-1* grown solely in 8h SD, solely in 20h LD, or 7 or 15 days after a shift from 8 weeks in SD to LD. RNA was prepared from newly expanded leaves on the parent culm. (B) Diurnal *FTL9* mRNA fluctuations in 8-h SD. Plants were grown in SD until the fourth-leaf stage was reached at which point newly expanded leaves were harvested every 4 hours throughout a 48-h diurnal cycle. Shaded boxes represent dark periods. (C) *FTL9* and (D) *FTL10* mRNA levels in 8, 12, 16, and 20-h photoperiods. *Koz3* was grown to the four-leaf stage and newly expanded leaves were harvested in the middle of the photoperiod. (E) Representative image of T0 generation *UBI:FTL10* plants showing rapid spikelet formation (bracket) on callus regeneration media. All 15 independent *UBI:FTL10* calli flowered rapidly in regeneration media. Those plants without the transgene did not flower rapidly. *UBI:FTL10* T1 generation days to heading and leaf count data see Fig. S4I-J. Bar=.5cm. (A-D) Values represent the average of three biological replicates  $\pm$  standard deviation (4 leaves per replicate). Similar results were obtained in independent experiments. Gene expression was normalized to *UBC18* as described in (Ream et al., 2014).



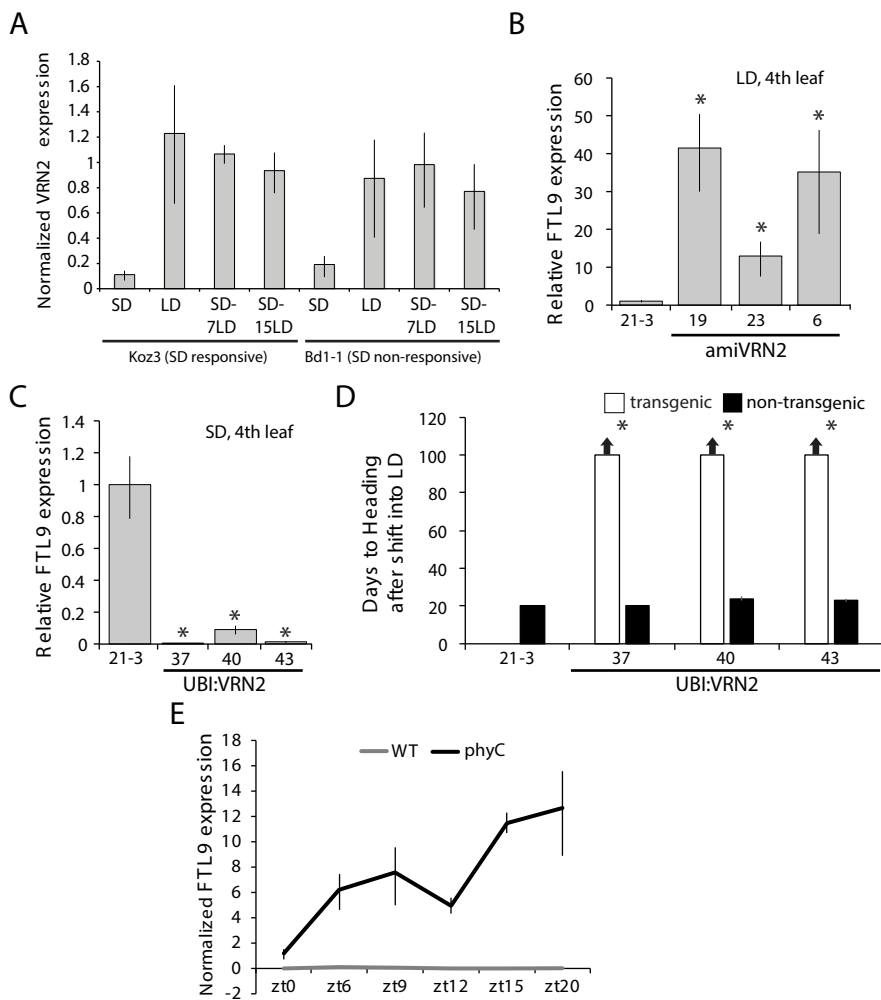

Fig. 4. *VRN2* represses *FTL9* in LD.

(A) *VRN2* is most highly expressed in LD. *VRN2* mRNA levels in Koz3 and Bd1-1 grown solely in 8h SD, solely in 20h LD only, or 7 and 15 days after a shift from SD to LD. Samples as described in Fig. 3A. (B) *FTL9* is expressed in LD when *VRN2* expression is reduced. *FTL9* mRNA levels were assessed by qRT-PCR in samples from a newly expanded leaf of Bd21-3 and *amiVRN2* plants at the fourth-leaf stage grown in 16-h LD. (C) *FTL9* expression is reduced in SD if *VRN2* is constitutively expressed. *FTL9* mRNA levels were determined as in B. (B,C) Average relative *FTL9* expression is shown for four biological replicates +/- standard deviation (4 leaves per replicate). Asterisk indicates a P-value < .05. See Figure 4-figure supplement 1 for *VRN2* expression. (D) Constitutive *VRN2* expression blocks the SD vernalization response. Days to heading for 3 independent *amiVRN2* transgenic lines (white bars) grown in SD for 10 weeks before shifting to 14h LD; wt Bd21-3 and segregating non-transgenic plants (black bars) show a normal SD vernalization response. Bars represent the average of 12 plants +/- standard deviation. (E) Gene expression of *FTL9* in Bd21-3 (grey line) and *phyC* (black line; *phyC-1* allele was used). Plants were grown in LD (20-hr days) until the fourth leaf stage was reached at which point the newly expanded fourth leaf was harvested at zt0, zt6, zt9, zt12, zt15 and zt20. The average of three biological replicates are shown +/- standard deviation (three leaves per replicate).

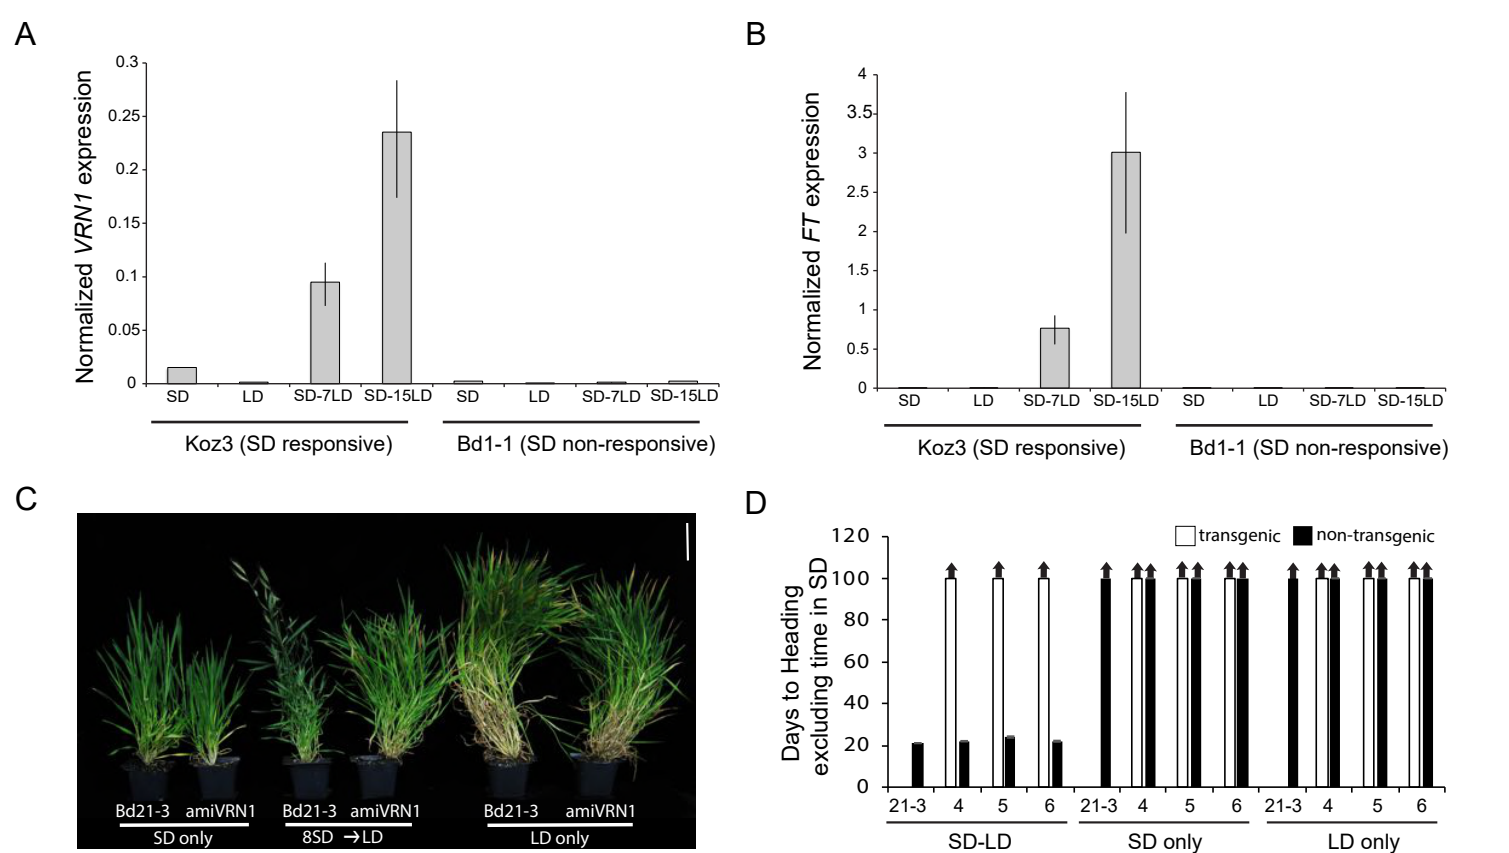

Fig. 5. SD vernalization induces the floral promoting genes *FT1* and *VRN1* in LD and the SD vernalization response depends on *VRN1* expression.

(A) *FT* and (B) *VRN1* mRNA levels in Koz3 and Bd1-1 grown solely in 8h SD, solely in 20h LD, or 7 or 15 days after a shift from 8 weeks in SD to LD. RNA was prepared from newly expanded leaves on the parent culm. Values represent the average of three biological replicates +/- standard deviation (4 leaves per replicate). The experiment was repeated with similar results. Expression normalized to *UBC18* as in Ream et al., 2014. (C) Knockdown of *VRN1* expression blocks the SD vernalization response. Representative photo of Bd21-3 wild-type, and *amiVRN1* grown in 8-h photoperiod (SD) only, 14-h photoperiod (LD) only and after a shift from 8 weeks in SD to LD. Bar=5cm. (D) Days to heading for 3 independent *amiVRN1* transgenic lines (4,5,6; white bars) grown in SD for 10 weeks before shifting to 14h LD; wt Bd21-3 and segregating non-transgenic plants (black bars) show a normal SD vernalization response. Bars represent the average of 12 plants +/- standard deviation.

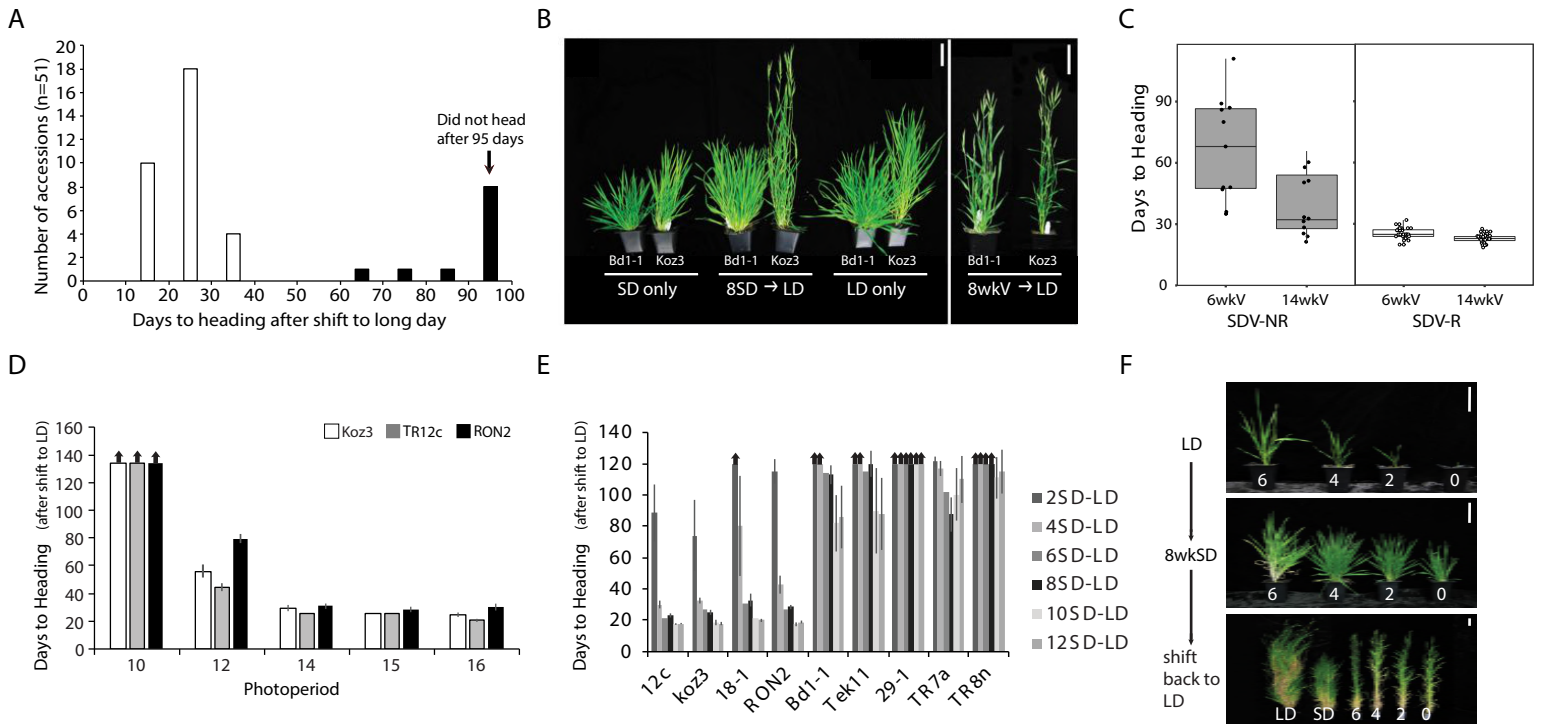

Figure 1. Natural variation in the short-day (SD) vernalization response in *B. distachyon*. (A) SD vernalization response in 51 accessions that require cold mediated vernalization. Plants were grown for 56 days in 8h SD before the shift into long days (LD) of 14h or 16h. Day temperature of 21°C and night temperature of 18°C. SD vernalization is equally effective when day and night temperatures are constant (see materials and methods for details). White bars indicate accessions that are SD vernalization responsive and black bars accessions that are SD vernalization non-responsive. (B) Image of a representative SD vernalization responsive accession Koz3 and a SD vernalization non-responsive accession Bd1-1 taken after 100 days of growth. Only Koz3 flowers after the SD to LD shift whereas both accessions flower rapidly if exposed to 8 weeks of cold (8wkV) prior to growth in 16h LD. (C) Box plot illustrating that SD vernalization non-responsive accessions (SDV-NR, black dots) require longer periods of cold exposure to flower rapidly in 16h LD relative to SD vernalization responsive (SDV-R, white dots) accessions. The difference between SDV-NR and SDV-R flowering after vernalization is statistically significant. See supplemental Table S1-2 for days to heading, leaf count and standard deviation data for SD vernalization and Table S3 for days to heading data for 6 and 14 weeks of vernalization (6wkV and 14wkV). Bar=5cm (D) Short day vernalization response in three delayed-flowering accessions Koz3, TR12c and RON2 when shifted into 10, 12, 14, 15, and 16-h days. In this experiment, LD only and SD only control plants flowered similar to those in Table S1-2 (data not shown). Arrows indicate treatments in which plants did not flower within the experiment. Bars represent the average days to heading of 12 plants for each treatment. (E) SD vernalization time course. See Figure 1-figure supplement1B for SD and LD only controls and Figure 1-figure supplement1C for representative photo of plants at the end of the experiment. (F) The SD vernalization response is effective at multiple developmental stages. Koz3 and Tr12c were grown for 6, 4, 2, 0 weeks under 16-h LD before shifting into 8 weeks of 8-h SD (8wkSD). After the SD treatment plants were shifted back into LD. Representative photo of Koz3 taken after 40 days. See Figure 1-figure supplement1D, E for days to heading and leaf count data.

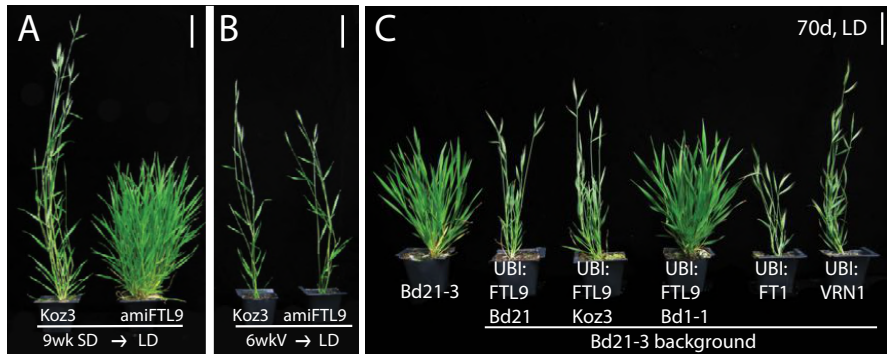

Figure 2. FTL9 is necessary for the SD vernalization response and sufficient to confer competence to flower.

(A) amiFTL9 knockdown prevents SD vernalization. Koz3 wild-type and amiFTL9 knockdown plants grown in 8h SD for 9 weeks (9wk SD) before shifting into 20h LD. Bar= 5cm. (B) amiFTL9 knockdown has no effect on cold-mediated vernalization. Plants were vernalized as imbibed seed at 5°C for 6 weeks (6wkV) before outgrowth in 20h LD. Bar= 5cm. See Figure 2-figure supplement 1 for amiFTL9 details. All experiments were repeated with similar results. (C) Constitutive expression of dominant FTL9 alleles permits flowering in LD. Representative photo of Bd21-3 wild-type, UBI:FTL9 Bd21 ( FTL9 from Bd21), UBI:FTL9 Koz3 ( FTL9 from Koz3), UBI:FTL9 Bd1-1 ( FTL9 from Bd1-1), UBI:FT1 , and UBI:VRN1 grown in a 16-h photoperiod (LD) without cold or short day vernalization. All over expression lines are in the Bd21-3 background. Bar=5cm. See Figure 2-figure supplement 3 for UBI:FTL9 details including days to heading, leaf count data as well as mRNA expression analyses.

UBI:FTL9

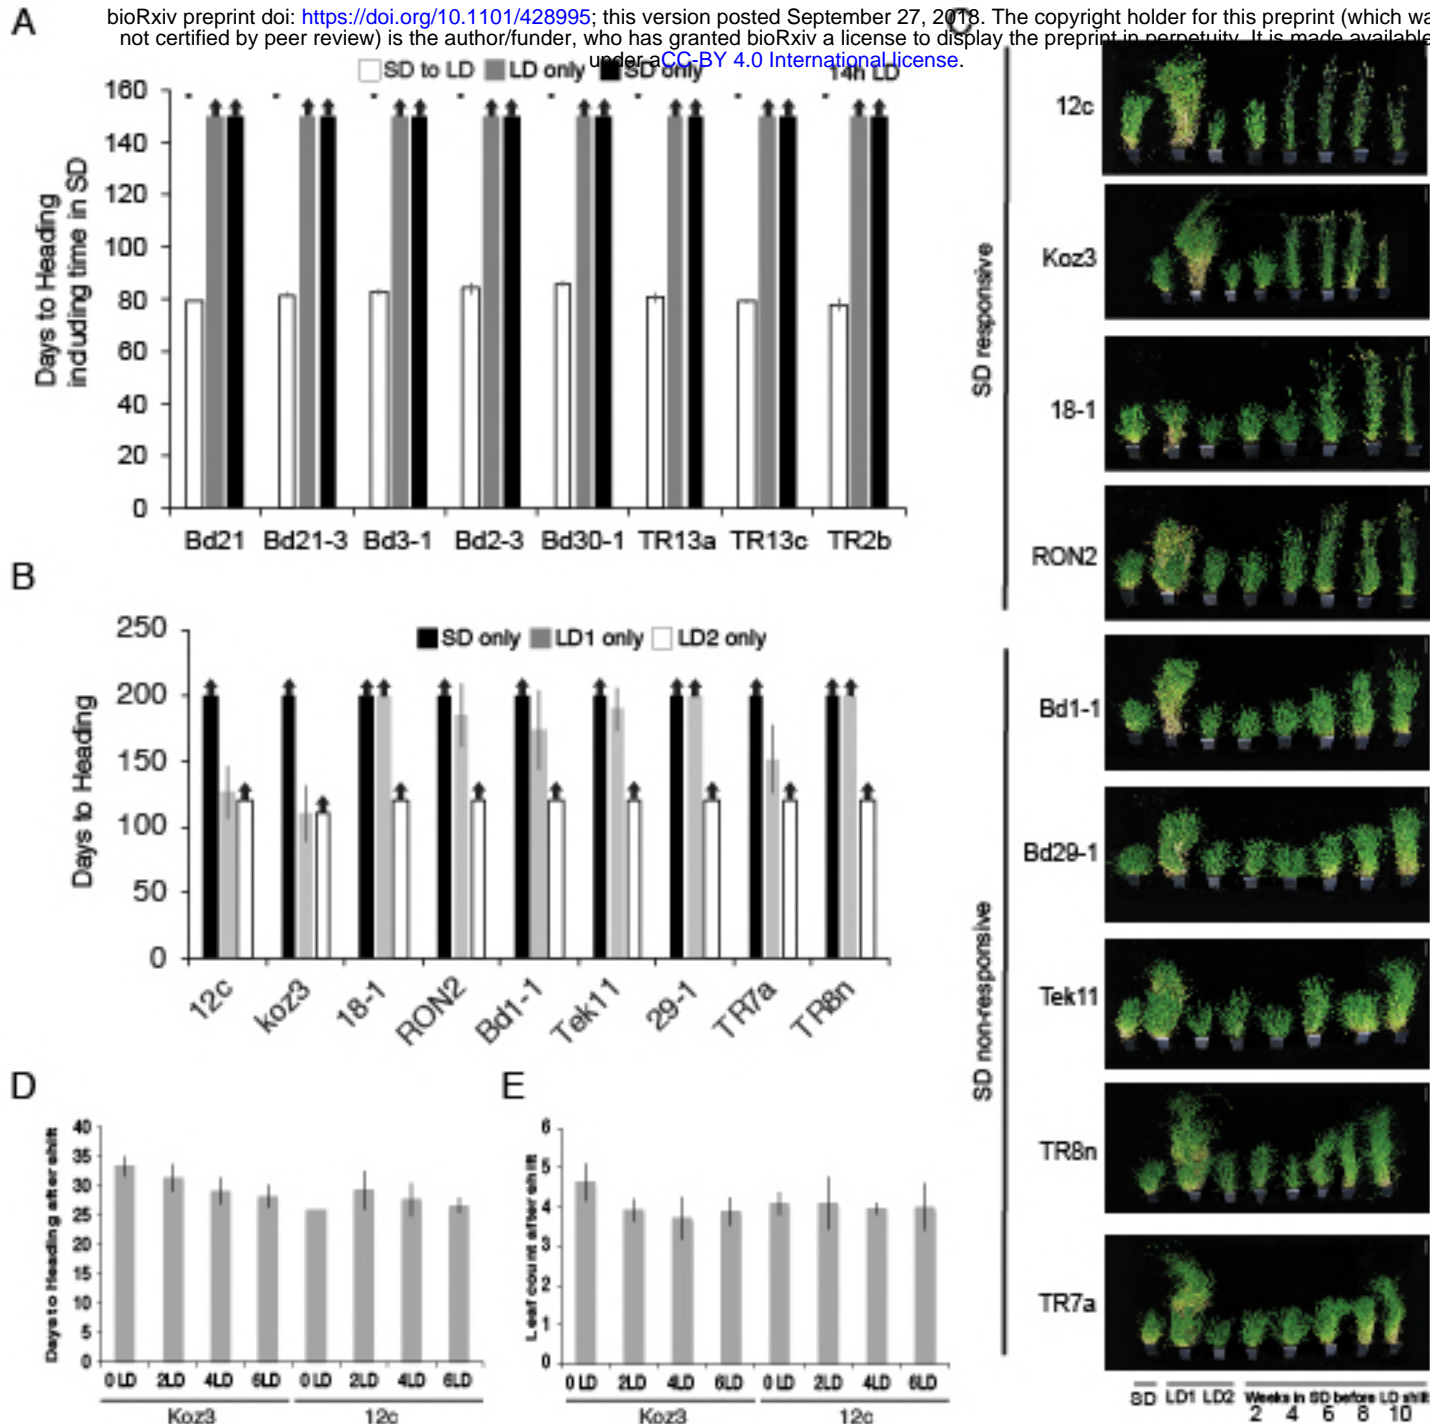

### Figure 1-figure supplement 1. Natural variation in the short day vernalization response

(A) Short day vernalization response in eight accessions which flower rapidly in 20h or 16h daylengths, but which require vernalization when grown in a 14h daylength. White bars represent plants grown in 8h short days for 8 weeks before shifting into 14h long days (14h LD). Grey bars represent control plants grown solely in 14h LD (LD only) for the duration of the 150-day experiment and black bars represent control plants grown solely in 8h short days (SD only) for the duration of the experiment. Asterisks indicate statistically significant differences between SD to LD and LD only control plants ( $p < 0.05$ ). Arrows indicate treatments in which plants did not flower within the 150-d experiment. Bars represent the average days to heading of 12 plants for each treatment. (B) Days to heading of SD and LD only controls for the multiple developmental stages experiment. LD1, 20-h days for the full duration of the experiment. LD2, 20-h days but planted once all SD treated plants were shifted into LD. (C) Representative photographs of plants at the end of SD exposure time course experiment. LD1, 20-h days only for the full duration of the experiment. LD2, 20-h days but planted once all SD treated plants were shifted into LD. Bar=12cm. (D) Days to heading after shift into LD (E) Number of leaves formed on the parent culm after plants shifted into LD and flowered.

A

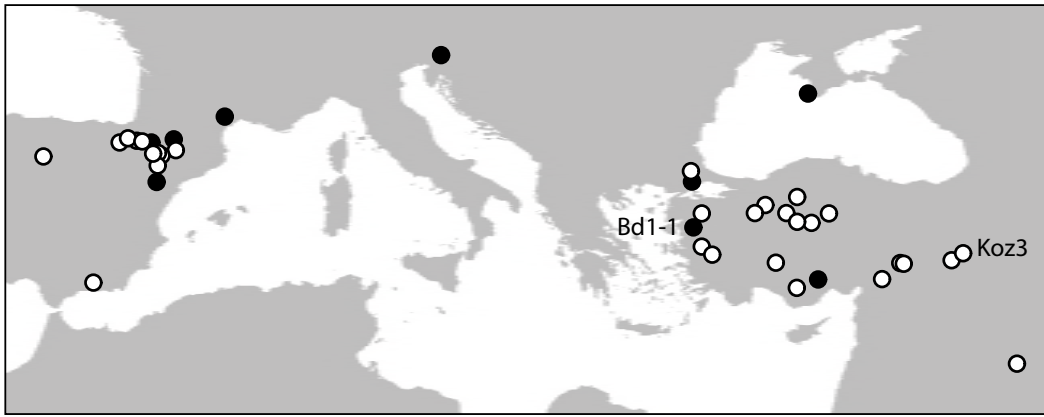

B

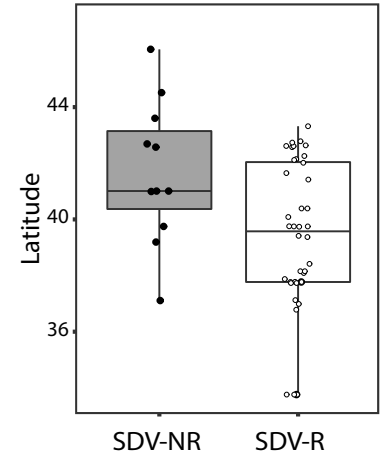

C

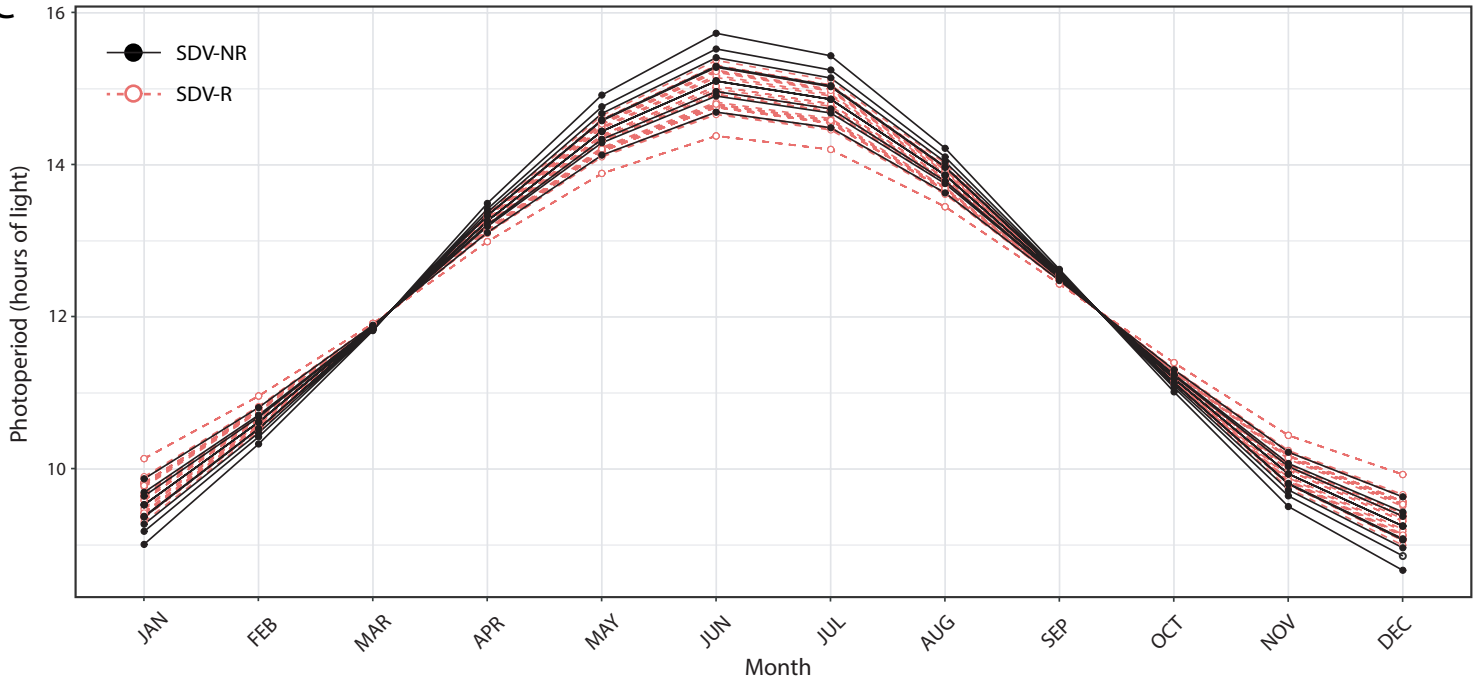

**Figure 1-supplement figure 2. Geographical distribution of *B. distachyon* accessions used in this study. (A)** Black dots represent SD vernalization-non-responsive accessions and white dots represent SD vernalization-responsive accessions. **(B)** Box plot indicating latitudinal distribution of SD vernalization non-responsive (SDV-NR; gray bar) and SD vernalization responsive (SDV-R; white bar) accessions. The difference is significant ( $P < 0.05$ ). **(C)** Photoperiod throughout a year for each accession used in this study in their native habitat.

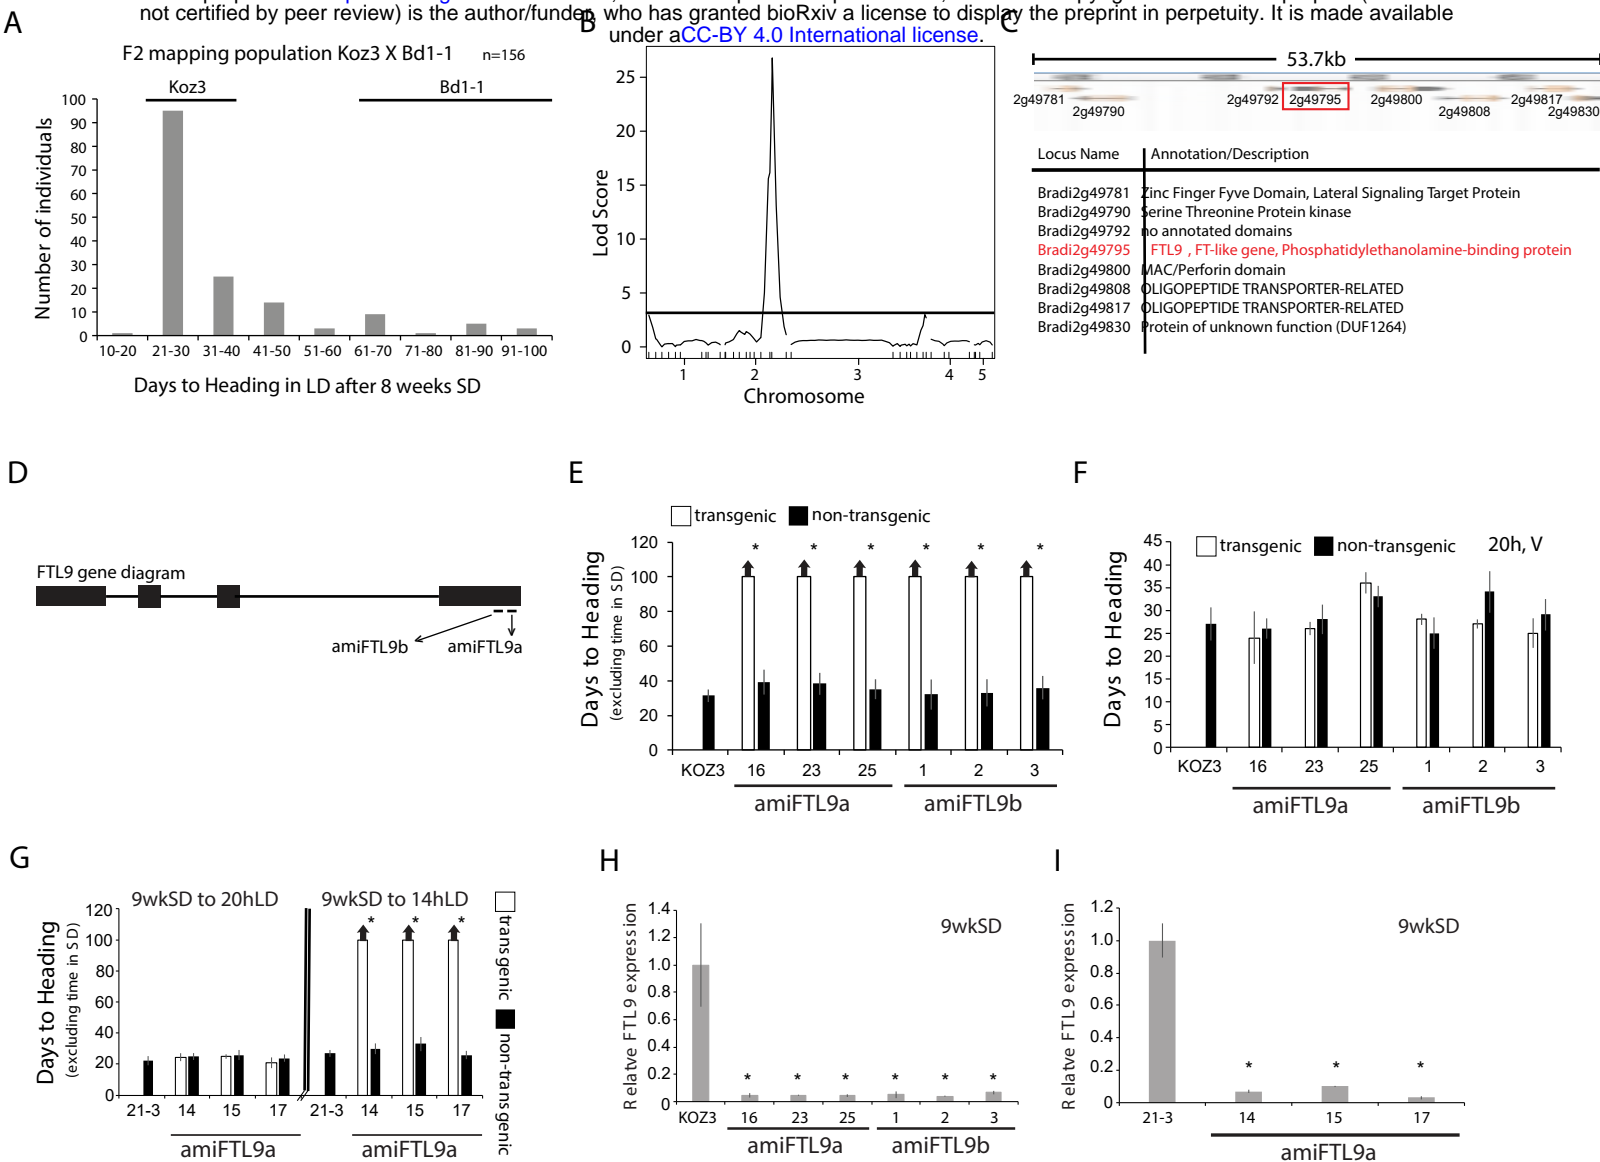

Figure 2- figure supplement 1. Identification of the *FT*-like paralog *FTL9* as essential for SD vernalization. (A) Koz3 X Bd1-1 F2 mapping population. The F2 population was grown in 8h SD for 8 weeks before shifting into 20h LD. Days to heading does not include the time the population was in SD. Koz3 and Bd1-1 controls (grown in LD only) flowered as indicated above bars. (B) To identify regions of the *B. distachyon* genome contributing to the flowering variation in the F2 mapping population from (A), we performed a QTL analysis. Phenotypic data was correlated to genotypic data using 38 indel markers (see Table S4 for primer information and Data S1 for the phenotypic and genotypic data sets). A single, large-effect peak was detected at the bottom of chromosome 2. (C) Diagram of the 53.7kb interval containing the QTL using version 3.1 of the *B. distachyon* genome indicating 8 annotated genes within the interval. (D) Gene structure of *FTL9* showing the location of two amiRNA (*amiFTL9a* and *amiFTL9b*) targets in the 3' region of the gene. We targeted two different areas within the *FTL9* gene to control for off-target microRNA effects. (E) Days to heading of Koz3, three independent T1 *amiFTL9* transgenics (black bars), and non-transgenic sibling plants (white bars) grown in 20h days after exposure to 9 weeks of 8h SD. (F) Days to heading of Koz3, *amiFTL9* transgenics, and the non-transgenic sibling plants vernalized as imbibed seed for 4 weeks at 5C before outgrowth in 20h. (G) Days to heading of Bd21-3, three independent T1 *amiFTL9* transgenics (black bars), and non-transgenic sibling plants (white bars) grown in 20h and 14h. Bd21-3 does not have a vernalization requirement when grown under 20h light but does under 14h. For E,F, and G arrows above bars indicate that none of the plants flowered at the end of the experiment. (H-I) qRT-PCR of *FTL9* expression in *amiFTL9* confirming the knock down of *FTL9* expression in 8h SD. The newly formed ninth leaves on the parent culm were harvested either when the plants were at the ninth leaf stage or after 9 weeks of growth in 8h SD (9wkSD). Note the expression of the closely related paralog of *FTL9*, *FTL10* was not affected by the amiRNA nor was *VRN2* expression (data not shown). Asterisks above bars indicate statistically significant differences between *amiFTL9* transgenic and either wildtype or non-transgenic sibling plants (\* P<0.05).

A

| Gene ID      | Koz3 /SD vern. responsive (CDS variants)          | Bd1-1/SD vern. non-responsive (CDS variants)      |
|--------------|---------------------------------------------------|---------------------------------------------------|
| Bradi2g49781 | 2 non-syn; (29/40 1st variant, 31/40 2nd variant) | 0 variants                                        |
| Bradi2g49790 | 0 variants                                        | 0 variants                                        |
| Bradi2g49792 | 0 variants                                        | 0 variants                                        |
| Bradi2g49795 | 1 frameshift (29/40 have frameshift)              | 2 non-syn; (2/11 1st variant, 11/11 2nd variant ) |
| Bradi2g49800 | 1 non-syn (29/40 have non-syn)                    | 0 variants                                        |
| Bradi2g49808 | 1 non-syn, (31/40 have non-syn)                   | 0 variants                                        |
| Bradi2g49817 | 0 variants                                        | 0 variants                                        |
| Bradi2g49830 | 1 non-syn (27/40 have non-syn)                    | 0 variants                                        |

B

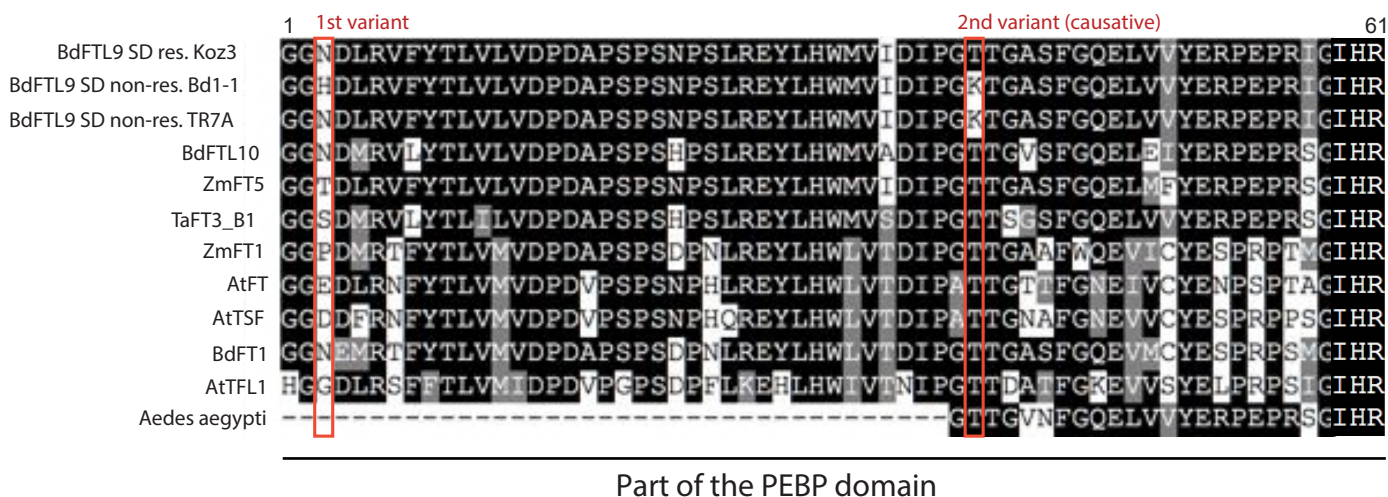

## Figure 2-figure supplement 2. Coding variant summary within the SD vernalization mapped interval between SD vernalization responsive and non-responsive accessions

(A) List of non-synonymous variants (non-syn) or frameshifts that occur in the coding (CDS) region of all annotated genes within the 53.7kb mapped interval between Koz3 and Bd1-1 and the remaining 49 *B. distachyon* accessions that have been sequenced (Gordon et al., 2017). In parentheses is the prevalence of that variant across the 40 SD responsive accessions or the 11 SD non-responsive accessions. For a complete list of all variants (intronic, UTR, and intergenic) in the genes within the mapped interval see Data S2. The putative causative variant is in red. Variants within the full genomic sequence of *FTL9* were confirmed in all 51 sequenced accessions by Sanger sequencing. (B) Alignment of part of the phosphatidylethanolamine-binding domain in *FT*-like genes including the ligand-binding motif. The red boxes denote the two non-synonymous variants present in Bd1-1 not found in SD vernalization responsive accessions such as Koz3. The N to H change (1st variant) is not found across all SD non-responsive accessions and the amino acids at that position are highly variable across *FT*-like genes. In contrast, the T to K change (2nd variant, causative) in Bd1-1 is present in all SD non-responsive accessions and is in an amino acid that is highly conserved in other PEBP containing genes spanning plants and animals (*Aedes aegypti*, a mosquito species, shown as an animal example). Bd= *Brachypodium distachyon*, Zm= *Zea mays*, Ta= *Triticum aestivum*, At= *Arabidopsis thaliana*.



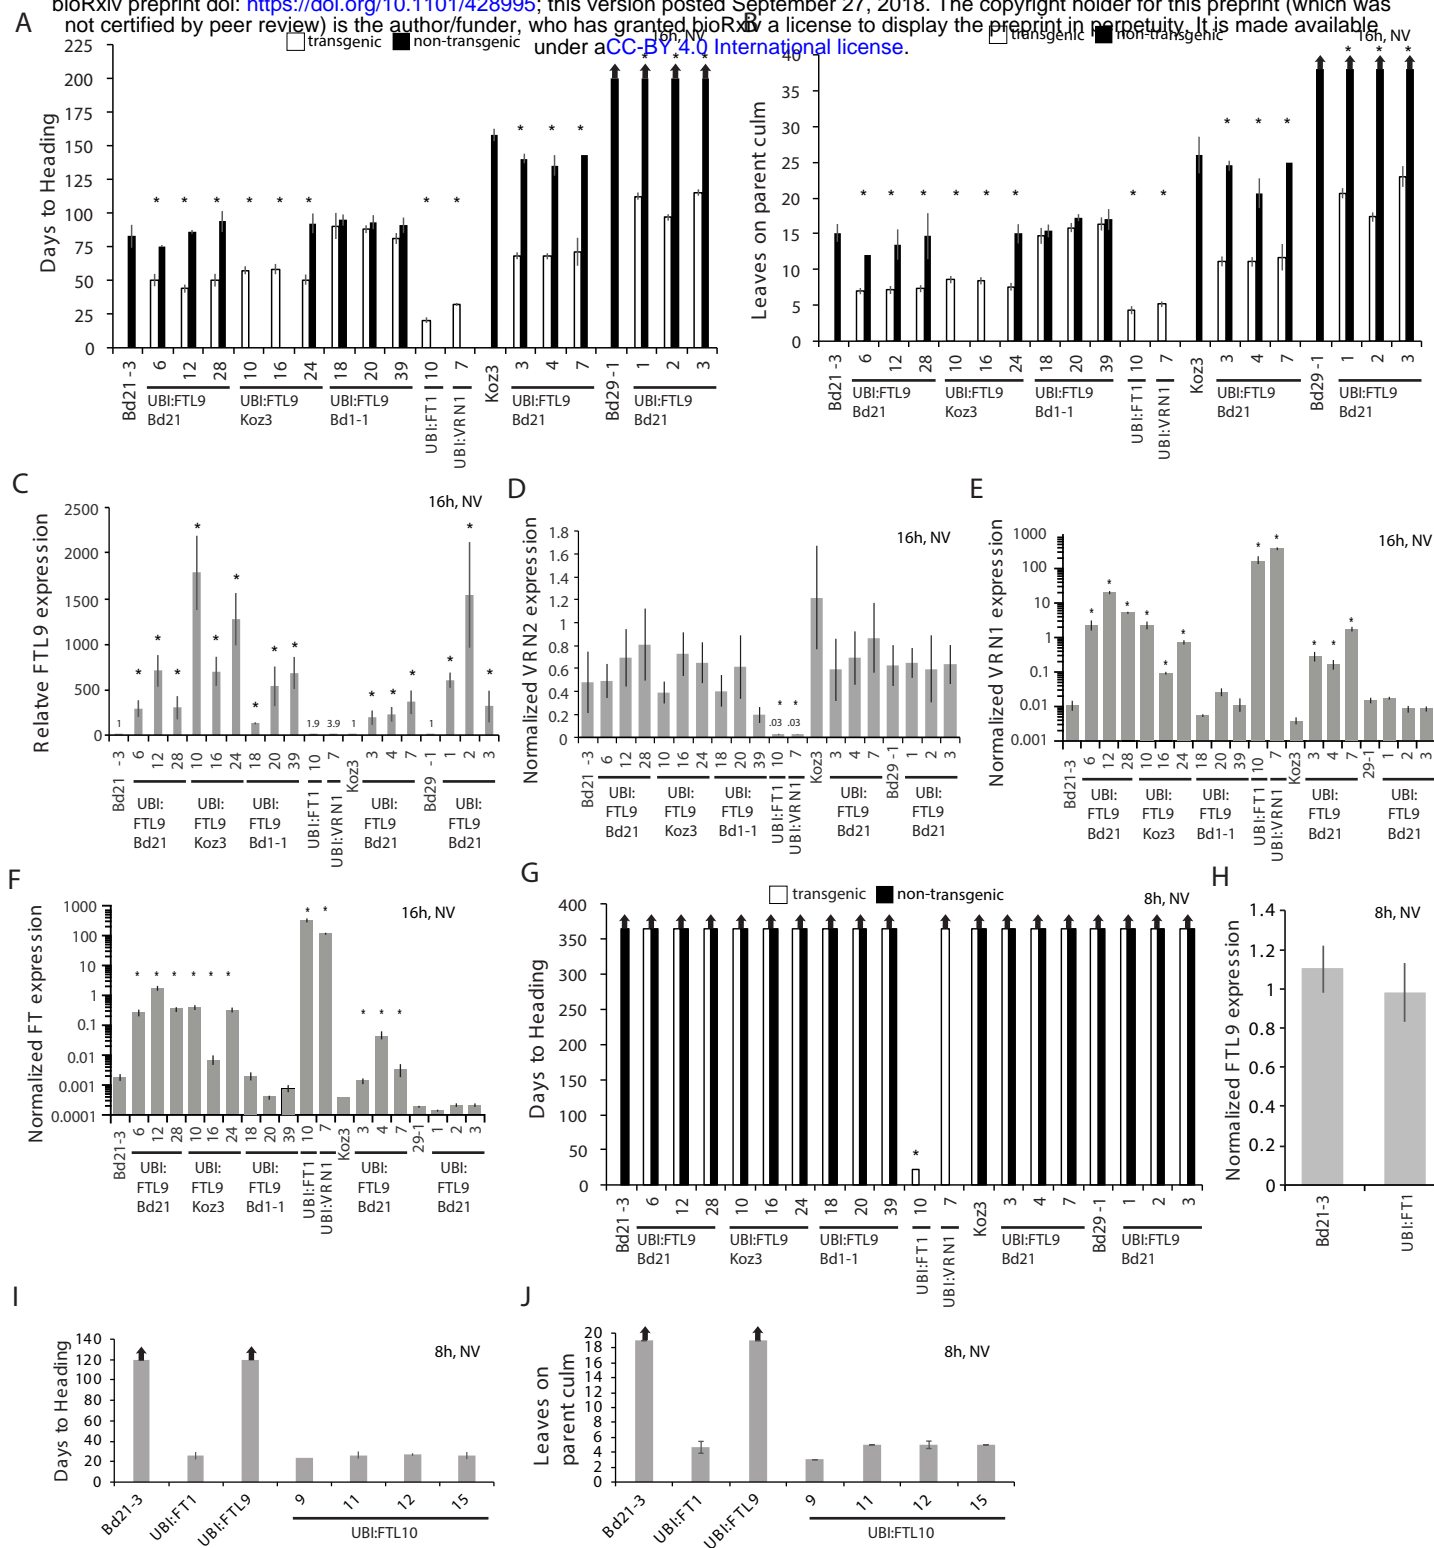

**Figure 2-figure supplement 3. Effects of ubiquitin promoter-mediated constitutive expression of *FTL9*, *FTL10*, *FT1*, and *VRN1*** (A-B) Flowering times as days to heading (A) or final leaf count on parent culm at time of flowering (B) of independent *UBI:FTL9* transgenic lines (white bars) in Bd21-3, Koz3, and Bd29-1 compared with the respective wild-types and segregating non-transgenics (black bars). Lines with no non-transgenic plants are fixed for the transgene. Bars represent the average of at least 6 plants +/- SD. The experiment was repeated with similar results (data not shown). Arrows above bars indicate that none of the plants flowered at the end of the experiment. (C-F) Quantitative RT-PCR expression data from the upper leaf at the fifth leaf stage grown in a 16-h photoperiod. Expression data are normalized to *UBC18* and represent the average of three biological replicates +/- SD. Expression analyses were repeated with similar results. Single asterisks indicate P-values <0.01. NV, non-vernalized. *UBI:FT1* and *UBI:VRN1* transgenics are described in (Ream et al., 2014). *UBI:FTL9* Bd21 cDNA is from Bd21, *UBI:FTL9* Koz3 cDNA is from Koz3 and *UBI:FTL9* Bd1-1 cDNA is from Bd1-1. (G) Days to heading in 8h photoperiod non-vernalized (NV). Dissections on the parent culm revealed that the meristems were still vegetative after 150 days of growth in SD for all lines except *UBI:FT1* which flowers rapidly. (H) Quantitative RT-PCR expression data from the upper leaf at the third leaf stage grown in a 8-h photoperiod in *UBI:FT1* and Bd21-3. (I) Flowering times as days to heading (J) or final leaf count on parent culm at time of flowering of 4 independent *UBI:FTL10* T1 transgenic lines, *UBI:FT1* (T2 generation) and *UBI:FTL9* Koz3 line 10 from (A) in this figure (T1 generation).

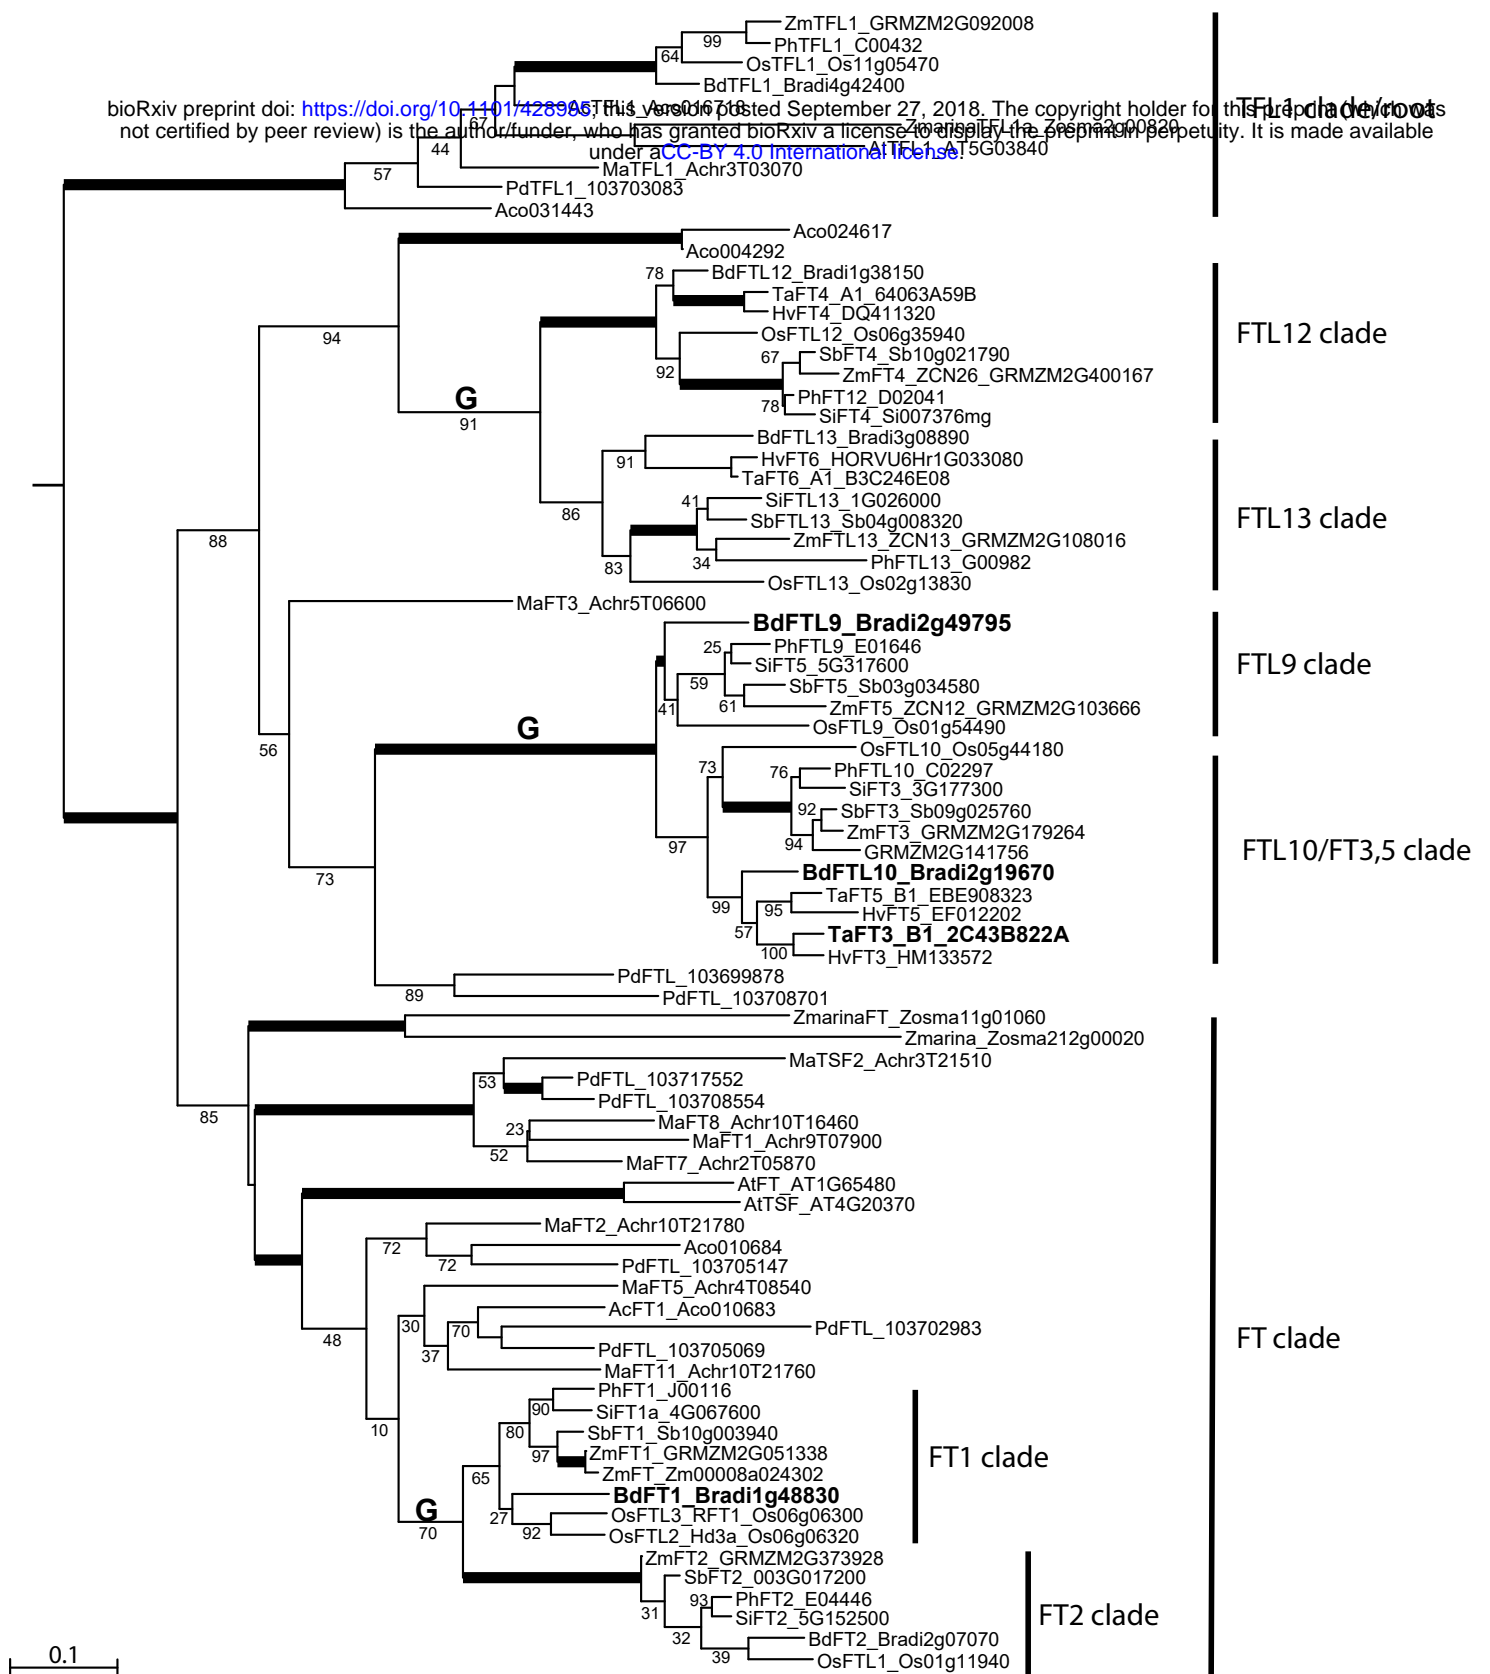

**Figure 2- figure supplement 4. Maximum likelihood phylogenetic relationships among a subset of FT-like genes based on a nucleotide alignment of the PEBP domain.** Maximum likelihood bootstrap support values indicated below branches with bold branches indicating bootstrap values of 100. “G” above branch indicates a grass-specific duplication. Scale bar indicates substitutions per site. Focal genes are labeled in large bold font. Note clades FTL9, 10, 12 and 13 contain only monocot species. Abbreviated species names: Bd, *Brachypodium distachyon*; Os, *Oryza sativa*; Ta, *Triticum aestivum*; Hv, *Hordeum vulgare*; Sb, *Sorghum bicolor*; Zm, *Zea mays*; Si, *Setaria italica*; Ph, *Panicum hallii*; Pd, *Phoenix dactylifera*; Ma, *Musa acuminata*; Z marina, *Zostera marina*; Ac, *Ananas comosus*; At, *Arabidopsis thaliana*. Sequence data was obtained from Phytozome v12 except sequence data for *P. dactylifera* was obtained from the KEGG database.

A

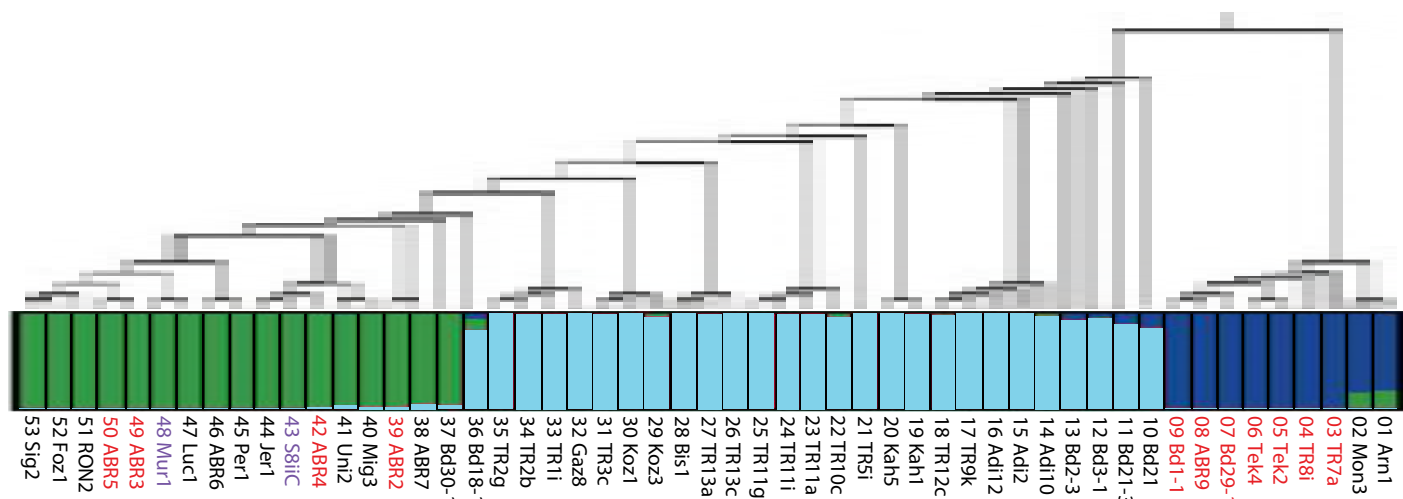

B

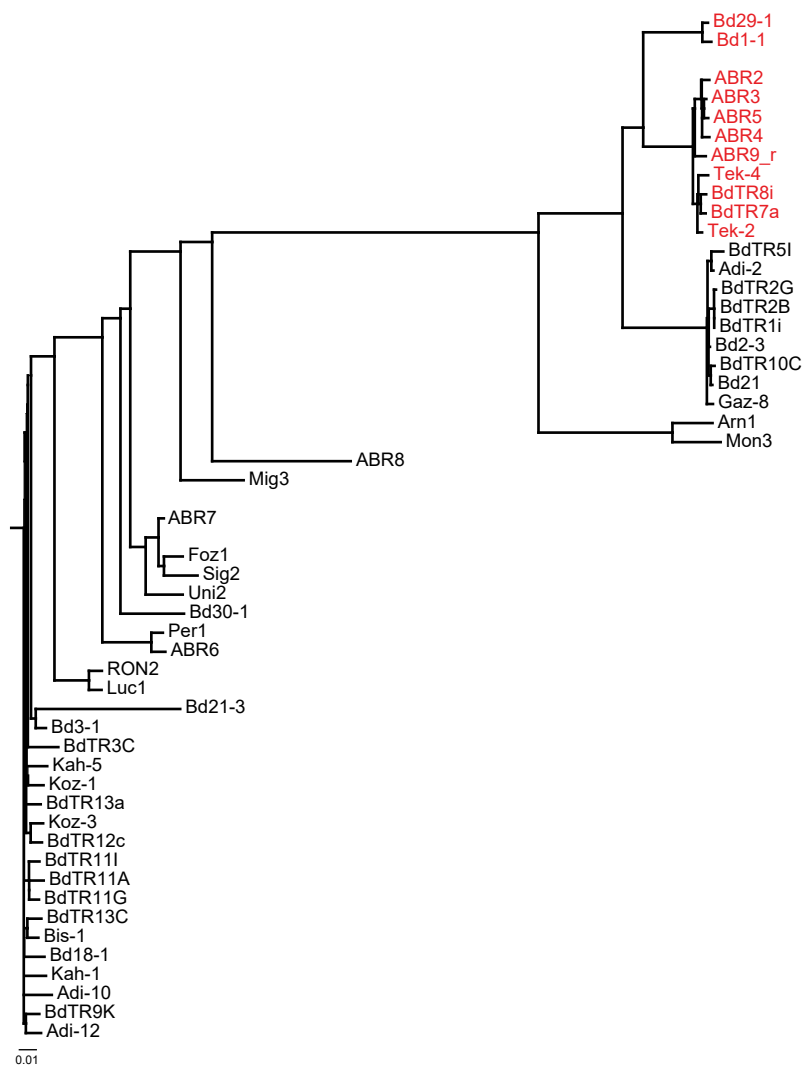

**Figure 2-figure supplement 5 Population analysis (A)** Maximum likelihood phylogenetic tree based on 3,933,264 SNPs spanning the genomes of 53 *B. distachyon* accessions, modified from (Gordon et al., 2017). Thickness of branches indicates bootstrap support: thick branches, 100%; intermediate, 70-99%; and thin, 50-69%. Red text indicates SD vernalization non-responsive accession, black text indicates SD vernalization responsive accessions, and purple text indicates accessions in which physiological experiments have not yet been conducted. Below the tree is a plot of individual membership (SNP profiles) to optimal K=3 Bayesian STRUCTURE groups: EDF+ miscellaneous (blue), middle eastern (light blue) and western european (green). **(B)** Phylogenetic analysis based on 940 SNPs spanning a 65kb mapped interval in which *FTL9* resides. Color of text same as (A). Scale bar indicates substitutions per site.

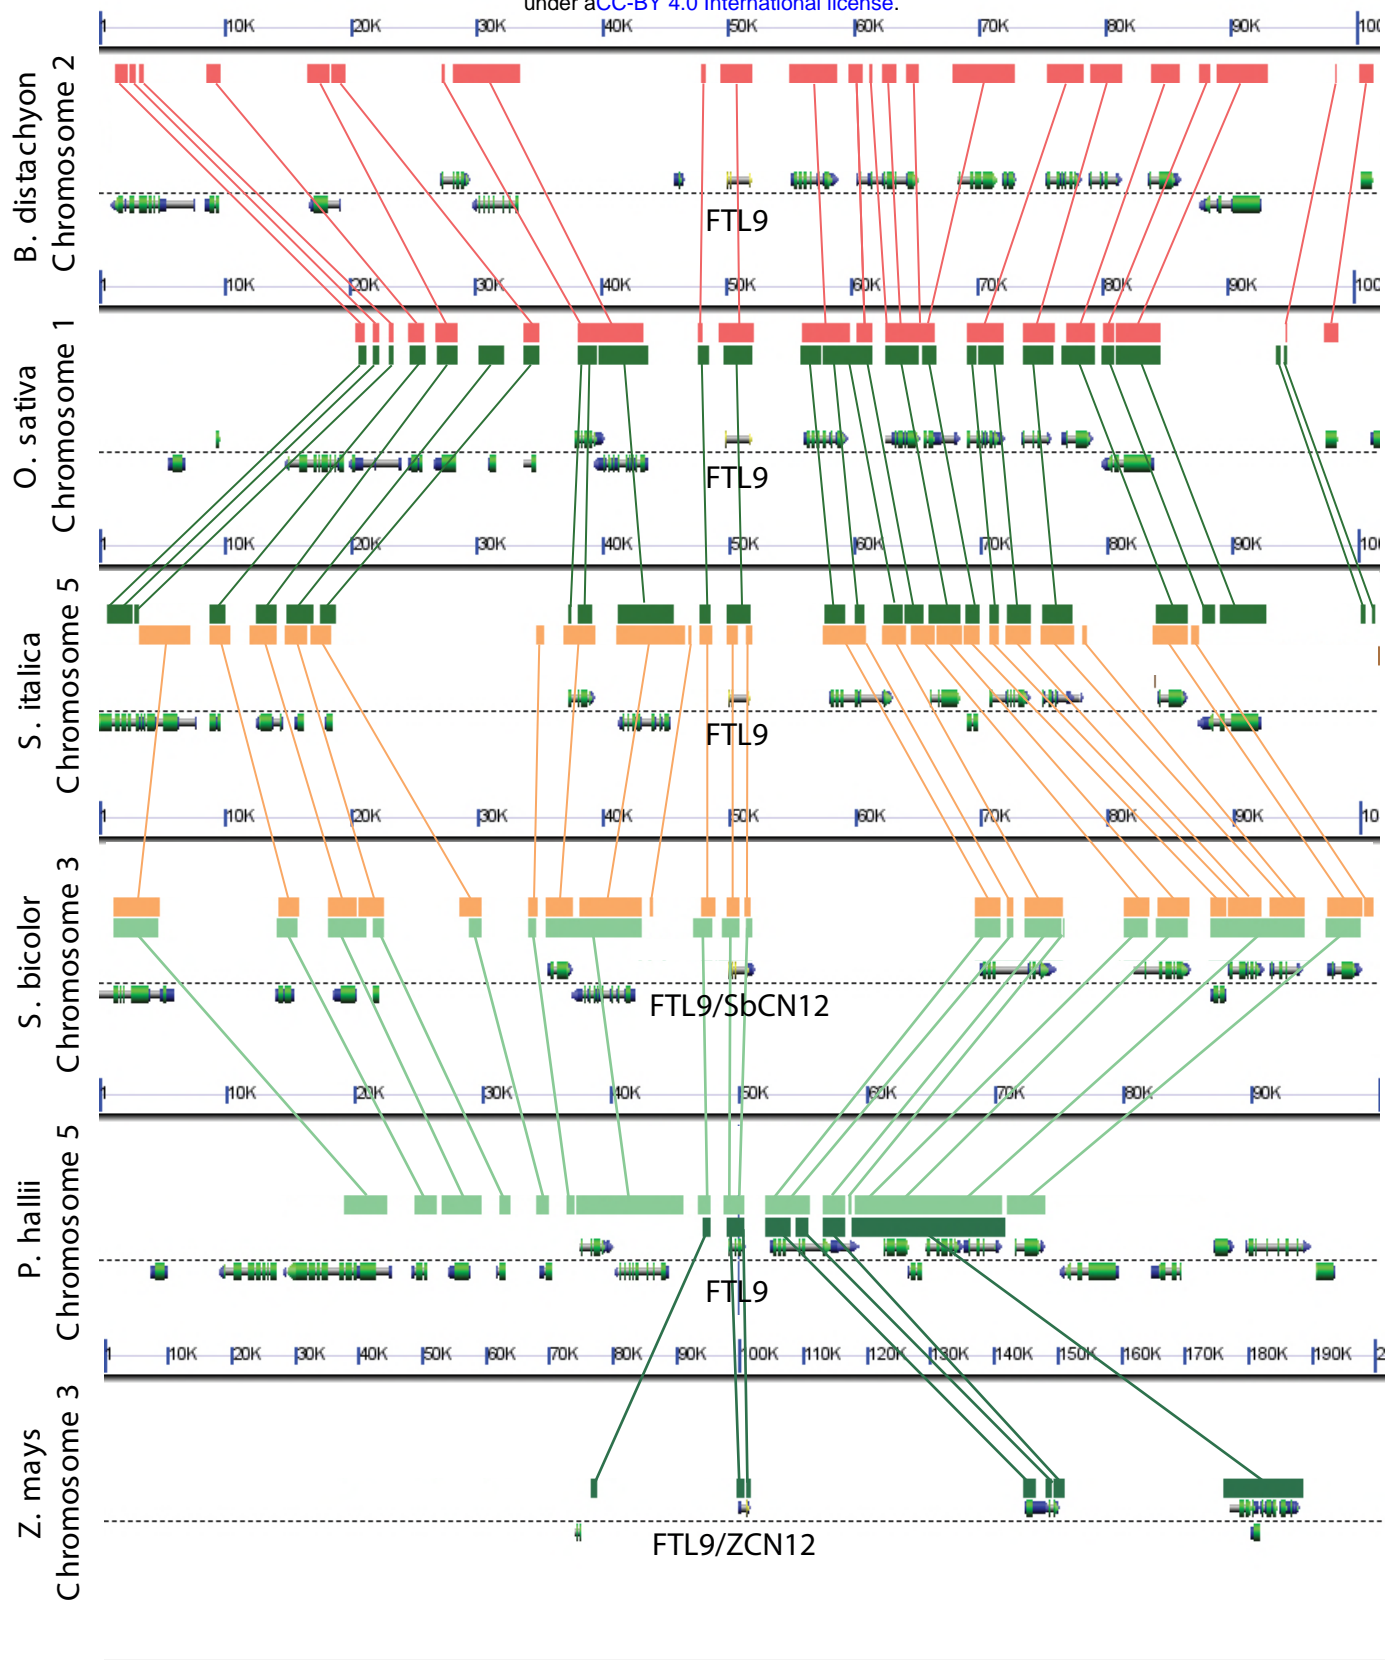

**Figure 2-figure supplement 6. Analysis of syntenic chromosomal regions containing *FTL9* orthologs in grasses.** Comparative analyses reveal conservation of gene order in an ~100kb genomic region around *FTL9* which supports the designations of *FTL9* orthologs throughout the grass family in the *FT*-like phylogenetic analysis in Figure 2-figure supplement 4 (Lyons et al., 2008).

A

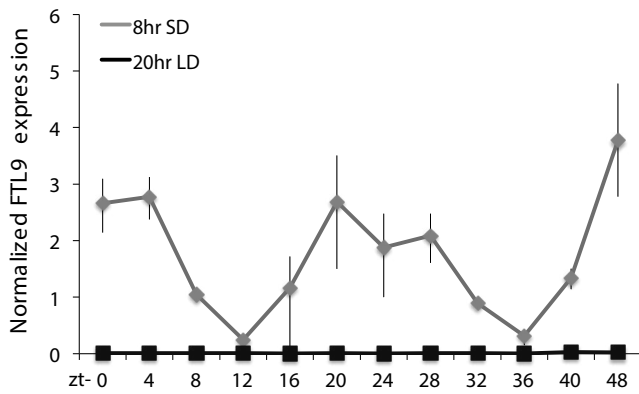

B

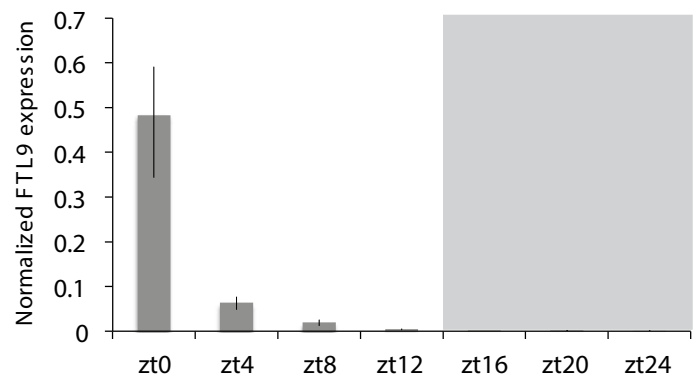

C

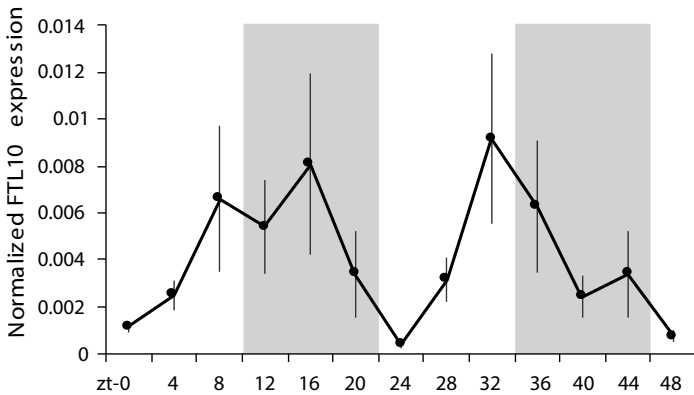

D

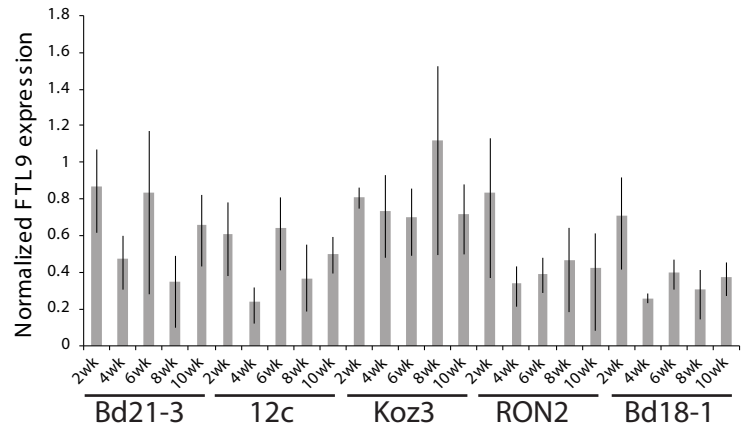

**Figure 3-figure supplement 1. *FTL9* and *FTL10* diurnal mRNA expression.** (A) Diurnal *FTL9* mRNA fluctuation in 8-h SD versus 20-h LD. Koz3 plants were grown in SD or LD until the fourth-leaf stage was reached at which point the newly expanded leaf was harvested at several time points throughout a 48-h diurnal cycle. In SD (8h light/16h dark) the dark periods were from zt 9-23 and 33-47. In LD (20h light/4h dark) the dark periods were from zt 20-23 and zt 44-47. (B) Plants were entrained under 8-h days until the fourth leaf stage was reached at which point the plant were grown in continuous darkness and the newly expanded fourth leaf was sampled every 4 hours for 24 hours. Shaded box represents subjective night. (C) Diurnal *FTL10* mRNA expression pattern in 8-h SD. For (A-C) values represent the average of four biological replicates +/- standard deviation (4 leaves per replicate). Shaded boxes represent dark periods. The experiment was repeated with similar results. Expression is normalized to *UBC18* as in (Ream et al., 2014). (D) *FTL9* mRNA expression in Bd21-3, 12c, Koz3, RON2 and Bd18-1 after 2-10 weeks of 8-h SD exposure. The newly expanded leaf on the parent culm was harvested at the end of the given SD treatment in the middle of the photoperiod. *FTL9* does not increase over time in SD in the accessions tested.

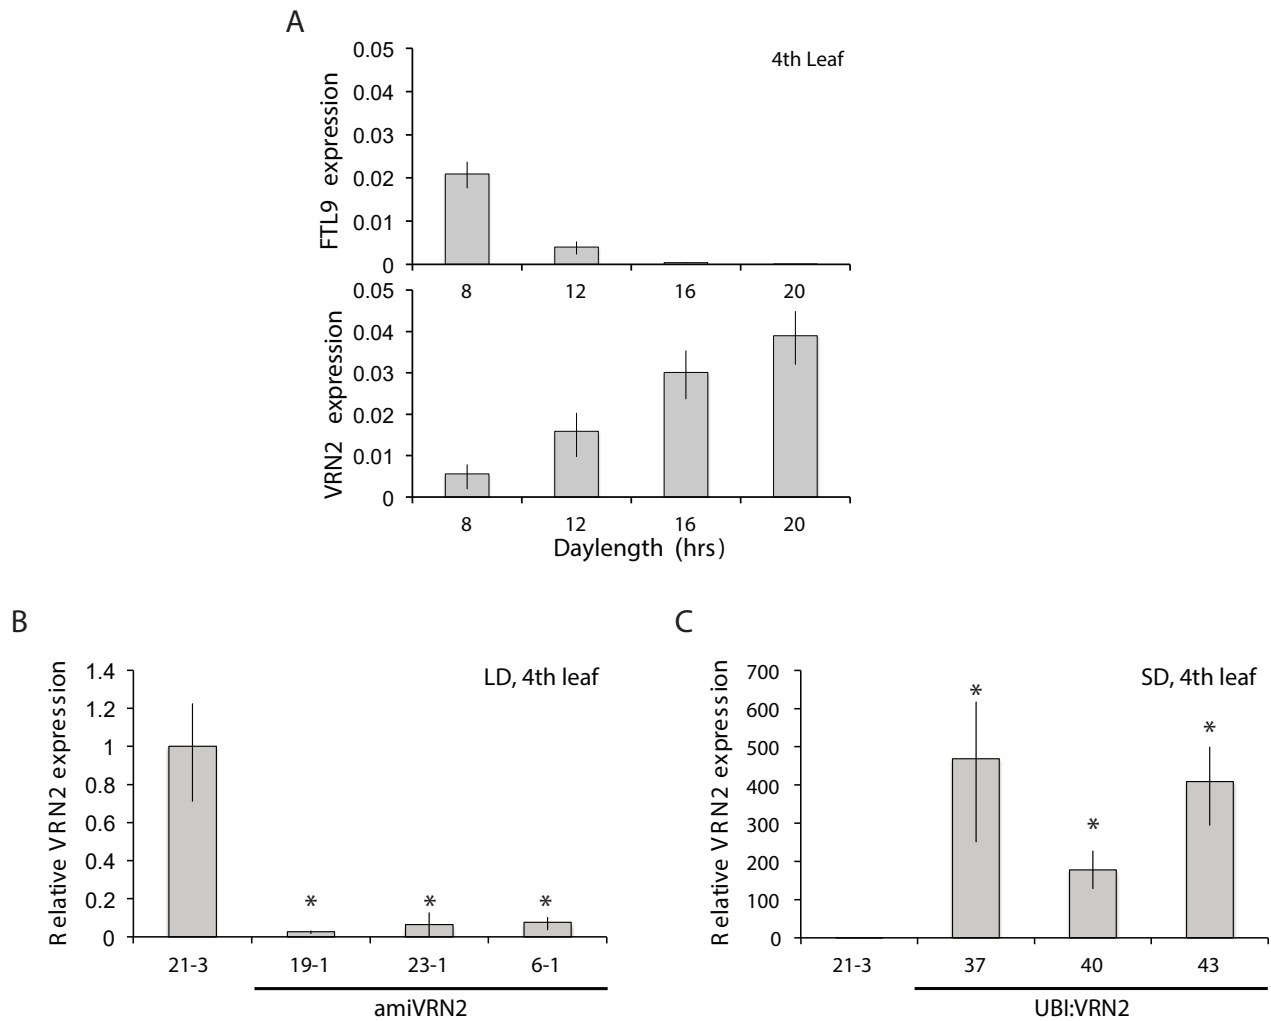

**Figure 4-figure supplement 1. *FTL9* and *VRN2* expression in different photoperiods and in *amiVRN2* and *UBI:VRN2* transgenics. (A) *FTL9* (top) and *VRN2* (bottom) mRNA levels in 8, 12, 16 and 20-h photoperiods. *Koz3* was grown to the fourth leaf stage and the newly expanded leaf was harvested in the middle of the photoperiod. (B) *VRN2* mRNA levels determined by quantitative RT-PCR from the upper leaf of *Bd21-3* and *amiVRN2* plants at the fourth-leaf stage grown in a 16-h photoperiod (LD). (C) *VRN2* mRNA levels in the upper leaf of *Bd21-3* and *UBI:VRN2* plants at the fourth-leaf stage grown in a 8-h photoperiod (SD). (A, B, C) Average relative *VRN2* expression is shown for four biological replicates +/- standard deviation (4 leaves per replicate). Asterisk indicate P-value <.05.**
